# Supplementary material for: Identifying and addressing conflicting results across multiple discordant systematic reviews on the same question: protocol for a replication study of the Jadad algorithm
Source: PubMed Central journal article supplement — BMJ Open. 2022 Apr 20;12(4):e054223. doi: 10.1136/bmjopen-2021-054223 (PMC9021774; doi:10.1136/bmjopen-2021-054223), 2022-04-20
Supplement: bmjopen-2021-054223.draft_revisions.pdf [file bmjopen-2021-054223.draft_revisions.pdf]

# BMJ Open

BMJ Open is committed to open peer review. As part of this commitment we make the peer review history of every article we publish publicly available.

When an article is published we post the peer reviewers' comments and the authors' responses online. We also post the versions of the paper that were used during peer review. These are the versions that the peer review comments apply to.

The versions of the paper that follow are the versions that were submitted during the peer review process. They are not the versions of record or the final published versions. They should not be cited or distributed as the published version of this manuscript.

BMJ Open is an open access journal and the full, final, typeset and author-corrected version of record of the manuscript is available on our site with no access controls, subscription charges or pay-per-view fees (<http://bmjopen.bmj.com>).

If you have any questions on BMJ Open's open peer review process please email [info.bmjopen@bmj.com](mailto:info.bmjopen@bmj.com)

# BMJ Open

## Identifying and addressing conflicting results across multiple discordant systematic reviews on the same topic: protocol for a replication study of the Jadad algorithm

|                               |                                                                                                                                                                                                                                                                                                                                                                                                                                                                                                                                                                                                                                                                                                                                                                                                                                                                                                                                                                                                                                                                                                                                                                                                                                                                                                                                                                                                                                                                                                                                                                                                                                                                                                                                                                                                                                                                                                                                                                                                                                                                                                                                          |
|-------------------------------|------------------------------------------------------------------------------------------------------------------------------------------------------------------------------------------------------------------------------------------------------------------------------------------------------------------------------------------------------------------------------------------------------------------------------------------------------------------------------------------------------------------------------------------------------------------------------------------------------------------------------------------------------------------------------------------------------------------------------------------------------------------------------------------------------------------------------------------------------------------------------------------------------------------------------------------------------------------------------------------------------------------------------------------------------------------------------------------------------------------------------------------------------------------------------------------------------------------------------------------------------------------------------------------------------------------------------------------------------------------------------------------------------------------------------------------------------------------------------------------------------------------------------------------------------------------------------------------------------------------------------------------------------------------------------------------------------------------------------------------------------------------------------------------------------------------------------------------------------------------------------------------------------------------------------------------------------------------------------------------------------------------------------------------------------------------------------------------------------------------------------------------|
| Journal:                      | <i>BMJ Open</i>                                                                                                                                                                                                                                                                                                                                                                                                                                                                                                                                                                                                                                                                                                                                                                                                                                                                                                                                                                                                                                                                                                                                                                                                                                                                                                                                                                                                                                                                                                                                                                                                                                                                                                                                                                                                                                                                                                                                                                                                                                                                                                                          |
| Manuscript ID                 | bmjopen-2021-054223                                                                                                                                                                                                                                                                                                                                                                                                                                                                                                                                                                                                                                                                                                                                                                                                                                                                                                                                                                                                                                                                                                                                                                                                                                                                                                                                                                                                                                                                                                                                                                                                                                                                                                                                                                                                                                                                                                                                                                                                                                                                                                                      |
| Article Type:                 | Protocol                                                                                                                                                                                                                                                                                                                                                                                                                                                                                                                                                                                                                                                                                                                                                                                                                                                                                                                                                                                                                                                                                                                                                                                                                                                                                                                                                                                                                                                                                                                                                                                                                                                                                                                                                                                                                                                                                                                                                                                                                                                                                                                                 |
| Date Submitted by the Author: | 10-Jun-2021                                                                                                                                                                                                                                                                                                                                                                                                                                                                                                                                                                                                                                                                                                                                                                                                                                                                                                                                                                                                                                                                                                                                                                                                                                                                                                                                                                                                                                                                                                                                                                                                                                                                                                                                                                                                                                                                                                                                                                                                                                                                                                                              |
| Complete List of Authors:     | <p>Lunny, Carole; University of Toronto Dalla Lana School of Public Health, Epidemiology Division and Institute for Health Policy, Management, and Evaluation<br/> Thirugnanasampanthar, Sai Surabi; University of Toronto Dalla Lana School of Public Health, Epidemiology Division; St Michael's Hospital Li Ka Shing Knowledge Institute, Knowledge Translation Program<br/> Kanji, Salmaan; The Ottawa Hospital, Department of Pharmacy; University of Ottawa, Faculty of Medicine<br/> Ferri, Nicola; University of Bologna, Department of Biomedical and Neuromotor Sciences<br/> Thabet, Pierre; Hôpital Montfort<br/> Pieper, Dawid; Witten/Herdecke University, Cologne, Germany<br/> Whitelaw, Sera; McMaster University, Department of Health Research Methods, Evidence, and Impact<br/> Tasnim, Sara; The University of British Columbia Faculty of Medicine, Anesthesiology, Pharmacology &amp; Therapeutics<br/> Nelson, Harrison; Queen's University Faculty of Health Sciences<br/> Reid, Emma; Nova Scotia Health Authority<br/> Zhang, Jia He (Janet); The University of British Columbia<br/> Kalkat, Banveer; The University of British Columbia, Faculty of Pharmaceutical Sciences<br/> Chi, Yuan; Beijing Yealth Technology Co., Ltd, Yealth Network<br/> Thompson, Jacqueline; University of Birmingham Institute of Applied Health Research<br/> Abdoulrezzak, Reema; The University of British Columbia, Faculty of Pharmaceutical Sciences<br/> Zheng, Di Wen (Wendy); The University of British Columbia, Faculty of Pharmaceutical Sciences<br/> Pangka, Lindy; The University of British Columbia, Faculty of Pharmaceutical Sciences<br/> Wang, Dian (Xin Ran); The University of British Columbia, Faculty of Pharmaceutical Sciences<br/> Safavi, Parisa; The University of British Columbia, Faculty of Pharmaceutical Sciences<br/> Sooch, Anmol; The University of British Columbia, Faculty of Pharmaceutical Sciences<br/> Kang, Kevin; The University of British Columbia, Faculty of Pharmaceutical Sciences<br/> Tricco, Andrea; Li Ka Shing Knowledge Institute of St Michael's Hospital,</p> |

1  
2  
3  
4  
5  
6  
7  
8  
9  
10  
11  
12  
13  
14  
15  
16  
17  
18  
19  
20  
21  
22  
23  
24  
25  
26  
27  
28  
29  
30  
31  
32  
33  
34  
35  
36  
37  
38  
39  
40  
41  
42  
43  
44  
45  
46  
47  
48  
49  
50  
51  
52  
53  
54  
55  
56  
57  
58  
59  
60

|           |                                                                                                                                                                            |
|-----------|----------------------------------------------------------------------------------------------------------------------------------------------------------------------------|
|           | Knowledge Translation Program; University of Toronto Dalla Lana School of Public Health, Epidemiology Division and Institute for Health Policy, Management, and Evaluation |
| Keywords: | PUBLIC HEALTH, STATISTICS & RESEARCH METHODS, EPIDEMIOLOGY                                                                                                                 |
|           |                                                                                                                                                                            |

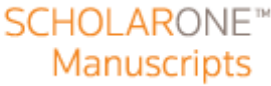

**Title: Identifying and addressing conflicting results across multiple discordant systematic reviews on the same topic: protocol for a replication study of the Jadad algorithm**

**Authors:**

- Lunny C, PhD<sup>1\*</sup>, [carole.lunny@ubc.ca](mailto:carole.lunny@ubc.ca), <https://orcid.org/0000-0002-7825-6765>, St Michael's Hospital, Unity Health Toronto and the Cochrane Hypertension Review Group, University of British Columbia, Vancouver, BC, Canada, V6T 1Z3
- Sai Surabi Thirugnanasampanthar, BHSc [Saisurabi.Thirugnanasampanthar@unityhealth.to](mailto:Saisurabi.Thirugnanasampanthar@unityhealth.to), Knowledge Translation Program, Li Ka Shing Knowledge Institute, St. Michael's Hospital, Unity Health and the Dalla Lana School of Public Health, University of Toronto, Toronto, ON, Canada
- Kanji S, Pharm.D., [skanji@toh.ca](mailto:skanji@toh.ca), The Ottawa Hospital and Ottawa Hospital Research Institute
- Ferri N, PT [Nicola.ferri11@unibo.it](mailto:Nicola.ferri11@unibo.it), Department of Biomedical and Neuromotor Sciences (DIBINEM), Alma Mater Studiorum, University of Bologna, 40138, Bologna, Italy
- Thabet P, B. Pharm, [pierrethabet@montfort.on.ca](mailto:pierrethabet@montfort.on.ca), Hôpital Montfort, Ottawa, Canada
- Pieper D, PhD, [Dawid.Pieper@uni-wh.de](mailto:Dawid.Pieper@uni-wh.de), Institute for Research in Operative Medicine, Witten/Herdecke University, Germany
- Whitelaw S, MSc [whitelsm@mcmaster.ca](mailto:whitelsm@mcmaster.ca), Department of Health Research Methods, Evidence and Impact, McMaster University, Hamilton, ON, Canada
- Tasnim S, MSc, [stasnim@mail.ubc.ca](mailto:stasnim@mail.ubc.ca), Cochrane Hypertension Review Group, Therapeutics Initiative, Department of Anesthesiology, Pharmacology & Therapeutics, Faculty of Medicine, University of British Columbia, 2176 Health Science Mall, Vancouver, BC, Canada, V6T 1Z3
- Harrison Nelson, [harrison.nelson@queensu.ca](mailto:harrison.nelson@queensu.ca), <https://orcid.org/0000-0001-8306-5448>, Faculty of Health Sciences, Queen's University, Kingston, ON, Canada
- Emma Reid, Pharm.D, [emmak.reid@nshealth.ca](mailto:emmak.reid@nshealth.ca), Nova Scotia Health, Halifax, Nova Scotia, Canada
- Jia He (Janet) Zhang, BSc, [jiahe.janet@gmail.com](mailto:jiahe.janet@gmail.com), University of British Columbia, Vancouver, BC, Canada
- Banveer Kalkat, [banveerk@student.ubc.ca](mailto:banveerk@student.ubc.ca), Faculty of Pharmaceutical Sciences, University of British Columbia, Vancouver, BC, Canada
- Yuan Chi. [yuan.chi@outlook.com](mailto:yuan.chi@outlook.com), Beijing Yealth Technology Co., Ltd, Yealth Network, Beijing, China

- 1 • Jacqueline Y Thompson, MPH [j.y.thompson@bham.ac.uk](mailto:j.y.thompson@bham.ac.uk), <https://orcid.org/0000-0002-9775-361X>, Institute of Applied Health Research, University of Birmingham, Edgbaston, Birmingham B15 2TT
- 2 • Reema Abdoulrezzak, BSc [reemaabd@student.ubc.ca](mailto:reemaabd@student.ubc.ca), Faculty of Pharmaceutical Sciences, University of British Columbia, Vancouver, BC, Canada
- 3 • Di Wen (Wendy) Zheng, BSc [wendyzhe@student.ubc.ca](mailto:wendyzhe@student.ubc.ca), Faculty of Pharmaceutical Sciences, University of British Columbia, Vancouver, BC, Canada
- 4 • Lindy R.S. Pangka, BSc [lpangka@shaw.ca](mailto:lpangka@shaw.ca), Faculty of Pharmaceutical Sciences, University of British Columbia, Vancouver, BC, Canada
- 5 • Dian (Xin Ran) Wang, BSc [dianw@student.ubc.ca](mailto:dianw@student.ubc.ca), Faculty of Pharmaceutical Sciences, University of British Columbia, Vancouver, BC, Canada
- 6 • Parisa Safavi, BSc [psafavi@student.ubc.ca](mailto:psafavi@student.ubc.ca), Faculty of Pharmaceutical Sciences, University of British Columbia, Vancouver, BC, Canada
- 7 • Anmol Sooch, BSc [asooch19@student.ubc.ca](mailto:asooch19@student.ubc.ca), Faculty of Pharmaceutical Sciences, University of British Columbia, Vancouver, BC, Canada
- 8 • Kevin T. Kang, BSc [ktw9412@student.ubc.ca](mailto:ktw9412@student.ubc.ca), Faculty of Pharmaceutical Sciences, University of British Columbia, Vancouver, BC, Canada
- 9 • Tricco AC, PhD, 1. Knowledge Translation Program, Li Ka Shing Knowledge Institute, St. Michael's Hospital, Unity Health Toronto, 209 Victoria St, M5B 1T8, Toronto, Ontario, Canada.; 2. Epidemiology Division and Institute for Health Policy, Management, and Evaluation, Dalla Lana School of Public Health, University of Toronto, 155 College St Room 500, M5T 3M7, Toronto Ontario, Canada; 3. Queen's Collaboration for Health Care Quality Joanna Briggs Institute Centre of Excellence, School of Nursing, Queen's University, 99 University Ave, K7L 3N6, Kingston, Ontario, Canada

44 \*Corresponding author

45 Lunny C, PhD<sup>1\*</sup>, [carole.lunny@ubc.ca](mailto:carole.lunny@ubc.ca), <https://orcid.org/0000-0002-7825-6765>, St Michael's Hospital, Unity Health Toronto and the Cochrane Hypertension Review Group, University of British Columbia, Vancouver, BC, Canada, V6T 1Z3

## ABSTRACT

**Introduction:** An increasing growth of systematic reviews (SRs) presents notable challenges for decision-makers seeking to answer clinical questions. Overviews of systematic reviews aim to address these challenges by summarising results of SRs and making sense of potentially discrepant SR results and conclusions. In 1997, an algorithm was created by Jadad to assess discordance in results across SRs on the same topic. Since this tool pre-dates the advent of overviews, it has been inconsistently applied in this context. Our study aims to (a) replicate assessments done in a sample of overviews using the Jadad algorithm to determine if the same SR would have been chosen, (b) evaluate the Jadad algorithm in terms of utility, efficiency, and comprehensiveness, and (c) describe how overviews address discordance in results across multiple SRs.

**Methods and Analysis:** We will use a database of 1218 overviews (2000-2020) created from a bibliometric study as the basis of our search for overviews assessing discordance. This bibliometric study searched MEDLINE (Ovid), Epistemonikos, and Cochrane Database for overviews. We will include any overviews using Jadad (1997) or another method to assess discordance. The first 30 overviews screened at the full-text stage by two independent reviewers will be included. We will replicate Jadad assessments in overviews. We will compare our outcomes qualitatively and evaluate the differences between our Jadad assessment of discordance and the overviews' assessment.

**Ethics and Dissemination:** No ethics approval was required as no human subjects were involved. In addition to publishing in an open-access journal, we will disseminate evidence summaries through formal and informal conferences, academic websites, and across social media platforms. This is the first study to comprehensively evaluate and replicate Jadad algorithm assessments of discordance in SRs.

**Abstract: 281 words**

### Strengths and limitations of this study

- This is the first proposed empirical study to use a systematic approach to evaluate authors' assessment of discordance across SRs in overviews and replicate Jadad algorithm assessments from a sample of overviews
- When assessing discordant SRs using the Jadad algorithm, there will be subjectivity in the judgements potentially introducing variability in the results. For example, some steps in the Jadad algorithm were vague in description, making it difficult to interpret.
- Therefore, a strength of the proposed study will be that we used an iterative process among authors to develop decision rules for the interpretation and application of each step in the Jadad algorithm. Upon completion and dissemination of this study, other overview authors will have more detailed guidance on how to apply the Jadad algorithm when addressing discordance in overviews.
- We have transparently described our interpretation of each step in the Jadad algorithm to aid in replication.

## 1.0 BACKGROUND

Information overload is an increasing problem for health practitioners, researchers, and decision-makers. Global research output is growing rapidly, and the number of published systematic reviews (SRs) being produced yearly is also expanding [1]. Between January and October 2020, 807 SRs on COVID-19 alone were published in PubMed [2], and the rate of growth from 1995 to 2017 in SRs was found to be 4676% [3]. Challenges in dealing with growth in SRs include identification of high quality, comprehensive, and recent reports on the topic of interest.

‘Overviews of systematic reviews’ (henceforth called overviews) evolved in response to these challenges [4-7]. Overviews summarise the results of SRs, and help make sense of potentially conflicting, discrepant, and overlapping results and conclusions of SRs on the same topic [8-12].

A major advantage of overviews is to identify and explain the discordance between conflicting SRs on the same topic [13-15]. We define discordance as when SRs with similar research questions and inclusion criteria report different results or conclusions. A common method for dealing with multiple SRs with discordant results is to specify methodological criteria to select only one SR (e.g., select the highest quality and most comprehensive SR) [12]. However, many other methods have been proposed, including statistical approaches to address discordance in results across SRs [11, 12].

As early as 1997, Jadad et al. [16] developed a decision tree (i.e. an algorithm) to assess discordance in results across a sample of SRs on the same topic to aid healthcare providers in making clinical decisions. The Jadad decision tree guides users through a methodological assessment of SR components to identify potential causes of discordance and ultimately choose the best SR among multiple on the same topic. Jadad et al.’s methods appear to be the only algorithm available to both explain and deal with discordance across SRs.

Despite the availability of this tool since 1997, it has not been universally adopted and has been inconsistently applied when used [17-19]. The aim of this study is to comprehensively replicate and evaluate the Jadad algorithm for assessing discordance across SRs.

## 2.0 OBJECTIVES

Our study objectives are:

- 1) Describe how overviews address discordance in results across multiple SRs (study 1)
- 2) Replicate Jadad assessments from published overviews to identify sources of discordance and to determine if the same review(s) was chosen as the “best available evidence” (study 2)
- 3) Evaluate the Jadad algorithm in terms of utility, efficiency, and comprehensiveness (study 2)



## 3.0 METHODS

### 3.1. Study design

This is a methods study in the knowledge synthesis field. We followed systematic review guidance for the study selection and data extraction stages [20]. Our protocol will be registered and located on the Open Science Framework at <https://osf.io/nbcta/>.

### 3.2 Search and selection of overviews

#### 3.2.1 Database of 1218 overviews

We will use a database of 1218 overviews published between January 1, 2000 and December 30, 2020 created from a bibliometric study [21] as the basis of our search for overviews using Jadad or another method to assess discordance. This bibliometric study searched the MEDLINE (Ovid), Epistemonikos, and the Cochrane Database of Systematic Reviews for overviews. The database Epistemonikos contains both published and unpublished reports. Overviews included in the bibliometric study contain these characteristics: (a) synthesised the results of SRs, (b) systematically searched for evidence in a minimum of two databases, and (c) conducted a search using a combination of text words and MeSH terms. The included overviews also had to have a methods section in the main body of the paper and focused on health interventions. To identify overviews assessing discordance using the database of 1218 overviews, we will use the EndNote search function and Boolean logic to search for the following words: overlap\*[title/abstract] or discrepant\*[title/abstract] or discord\*[title/abstract] or concord\*[title/abstract] or conflict\*[title/abstract] or Jadad [abstract].

#### 3.2.2 Medline (Ovid) search strategy January to April 2021

We will update this search for overviews published in the first quarter of 2021 with an Ovid MEDLINE search using the following search string: ("systematic reviews".tiab or "meta-analyses".tiab) AND (overlap.tiab or discrepant.tiab or discordant.tiab or difference.tiab or conflicting.tiab or Jadad.ab). Our search was conducted on April 18, 2021.

### 3.3 Screening overviews

#### 3.3.1 Process for screening overviews

Citations identified by our searches will be assigned a random number and screened sequentially. The first 30 overviews screened at full-text and meeting our eligibility criteria will be included.

1  
2 All authors will pilot the screening form on 20 overviews to ensure high levels of agreement and  
3 common definitions of eligibility criteria.  
4  
5

6  
7 Two authors will independently screen overviews as full-text publications. Discrepancies will be  
8 resolved by consensus, and arbitration by a third reviewer when necessary.  
9  
10

### 11 12 **3.3.2 Stage 1 screening criteria**

13 We first include all overviews aiming to assess discordant results across SRs on the same topic, which  
14 may or may not assess discordant interpretations and conclusions using any approach (e.g. [22-25]).  
15  
16

17  
18 If a study meets stage 1 criteria, it will be included in Study 1.  
19  
20

### 21 22 **3.3.3 Stage 2 screening criteria**

23 From this sample, we will then screen overviews based on the following inclusion criteria:  
24

- 25 • Must have included a minimum of 2 SRs with a meta-analysis of randomised controlled  
26 trials (RCTs), but may have included other study types beyond RCTs; and
- 27 • Used the Jadad algorithm.  
28  
29

30  
31 If a study meets stage 2 screening, it will move onto stage 3 screening.  
32  
33

### 34 35 **3.3.4 Stage 3 screening**

36 After stage 2 screening is complete, we will screen based on the authorship team. When the same  
37 ‘core’ authors (first, last, and/or corresponding) conduct two or more of the identified overviews, we  
38 will only include one of the multiple overviews (i.e. the most recent study will be selected). Our  
39 rationale is that author groups use the same methods to assess discordance (e.g. Mascarenas [18] and  
40 Chalmers [15]).  
41  
42  
43  
44

45  
46 We will include overviews in any language and publication status, published anytime. We will use  
47 Google translate to interpret non-English studies for screening and assessment. The resulting  
48 publications will form the set for study 2.  
49  
50  
51  
52  
53  
54  
55  
56  
57  
58  
59  
60

1  
2 In the case where the authors of this study are also authors of one or several of the included overviews,  
3 those authors will not conduct screening, extraction, Jadad assessment, or analysis of the overview in  
4 question.  
5  
6

7  
8  
9 Full-texts of all SRs included in an overview will be obtained.  
10

### 11 12 **3.4 Extraction of the primary intervention and outcome**

#### 13 14 **3.4.1 Identification of the primary outcome from the overview**

15 As a first step in assessing discordance, we will identify the primary outcome from each overview. The  
16 primary outcome will be extracted when it is explicitly defined in the title, abstract, objectives,  
17 introduction or methods sections [26, 27]. If the primary outcome is not found in any of these sections,  
18 we will extract it as the outcome that is reported in a power calculation; or the first outcome mentioned  
19 in the manuscript [26, 27] or the most serious outcome. If the primary outcome cannot be identified by  
20 any of these approaches, we will consider that the article did not specify primary outcomes and the  
21 study will be excluded, and replaced with the next overview in our database.  
22  
23  
24  
25  
26  
27

#### 28 29 **3.4.2 Identification of the primary intervention from the overview**

30 If multiple interventions are present, we will choose the intervention comparison with the  
31 “experimental” intervention vs. placebo or standard of care for the primary outcome, or the first  
32 intervention highlighted in the title or abstract of the overview [27].  
33  
34  
35  
36

#### 37 38 **3.4.3 Identification of included SRs with meta-analysis of RCTs addressing the primary 39 intervention/outcome of the overview**

40 Once the primary outcome is identified, we will next identify how many SRs with meta-analysis of  
41 RCTs were included in the overview that address the primary outcome and intervention. It is this  
42 sample of SRs with meta-analysis of RCTs that will be the focus of our Jadad assessments.  
43  
44  
45  
46

#### 47 48 **3.4.4 Process to identify primary intervention and outcome**

49 Two authors will extract the primary intervention and outcome, and disagreements will be discussed  
50 until consensus is reached.  
51  
52  
53

### 54 55 **3.5 Blinding of results in the included SRs with meta-analysis of RCTs**

1  
2  
3  
4  
5  
6  
7  
8  
9  
10  
11  
12  
13  
14  
15  
16  
17  
18  
19  
20  
21  
22  
23  
24  
25  
26  
27  
28  
29  
30  
31  
32  
33  
34  
35  
36  
37  
38  
39  
40  
41  
42  
43  
44  
45  
46  
47  
48  
49  
50  
51  
52  
53  
54  
55  
56  
57  
58  
59  
60

Observer bias, sometimes called “detection bias” or “ascertainment bias,” occurs when outcome assessments are systematically influenced by the assessors’ conscious or unconscious predispositions [28]. Blinded outcome assessors are used in trials to avoid such bias. One empirical study found evidence of high risk of substantial bias when authors failed to blind outcome assessors in trials [28], whereas another did not [29]. In our study, it is important that reviewers are blinded to the overview authors’ result of the Jadad assessment, as unblinding might predispose them to unconsciously choose the same review as the overview authors.

We will blind the following components containing study results of the Jadad assessment and conclusions: abstract, highlights, results of the Jadad assessment, and discussion/conclusions section. Blinding will be achieved via deletion using the paywalled Adobe Acrobat Pro or the freeware PDFCandy (<https://pdfcandy.com>). One author will blind the overview results and will not be involved in the Jadad assessment pertaining to those results. Assessors will be instructed not to search for and read the included overviews prior to, and during, assessment.

### 3.6 Piloting Jadad assessment prior to full assessment

A pilot practice exercise will be conducted by all assessors prior to the Jadad assessments, to ensure consistent assessments across reviewers. Two Jadad assessments will be piloted by each reviewer and compared to a second to identify discrepancies that are to be resolved through discussion. Any necessary revisions to the assessment (sections 3.7 and 3.8) will be noted.

### 3.7 Jadad assessments of discordance across SRs

While the Jadad paper provides an algorithm intended to identify and address discordance between SRs in an overview, there is limited guidance within the manuscript regarding the application/operationalization of the algorithm. Absence of this detailed guidance leaves room for subjective (mis)interpretation and ultimately confusion when it comes time to use the algorithm. To address this, we engaged in an iterative process of interpretation and implementation of the algorithm step by step. This process involved virtual meetings whereby consensus was sought for decision rules at each step of the algorithm to ensure consistency in both interpretation and application. Feedback was solicited and decision rules were accordingly adjusted until consensus was achieved. This tool underwent pilot testing as described in 3.6 where feedback was further solicited and adjustments were made.

1  
2 Two researchers will independently assess each set of SRs in the included overview using the Jadad  
3 algorithm, starting with Step C (**Figure 1**). Information and data from the overview will be used, and  
4 when data is not reported, we will consult the full text of the included SRs. The Jadad decision tree  
5 assesses and compares sources of inconsistency between SRs with meta-analyses, including differences  
6 in clinical questions, inclusion and exclusion criteria, extracted data, methodological quality  
7 assessments, data combining, and statistical analysis methods.  
8  
9  
10  
11  
12  
13

14 Step A is to examine the multiple reviews matching the overview question using a PICO framework. If  
15 the research questions are not identical, then step B indicates choosing the review closest to the  
16 decision makers' research question and no further assessment is necessary. If multiple reviews are  
17 found with the same PICO, then step C should be investigated. As we are using overviews examining  
18 discordance as our sample, we will start at Step C in the Jadad decision tree.  
19  
20  
21  
22  
23

24 Here we detail our interpretation of the Jadad algorithm for each step in assessing the discordance in a  
25 group of SRs with similar PICO elements. If an overview or the included review does not report a  
26 method, we will indicate it as "not reported," and it will not be chosen for that step.  
27  
28  
29  
30

31 Step D and G follow from Step C. Steps E, F, H, and I are completed depending on the decisions at  
32 Steps D and G, respectively.  
33  
34  
35

36 "Meeting" a step means a review met the criteria in the sub-step or step that is highest in the hierarchy.  
37 For example, a review that meets E3 criteria fulfills criteria A and B, which is the highest in our  
38 hierarchy.  
39  
40  
41  
42

### 43 3.7.2 Step C - Do the reviews include the same trials for the primary intervention and outcome?

44 We will determine if the RCTs are similar across reviews by either finding this information in the  
45 overview, or extracting all RCTs from the included reviews using an excel matrix to list the reviews at  
46 the top, and trials in the left rows. The RCTs will be mapped to the reviews in order of publication date  
47 (earliest trials at the top). Using this matrix, we will determine if the reviews include the same or  
48 different trials.  
49  
50  
51  
52  
53

### 54 3.7.3 Step D - Are the reviews of the same quality?

55  
56  
57  
58  
59  
60

1  
2  
3  
4  
5  
6  
7  
8  
9  
10  
11  
12  
13  
14  
15  
16  
17  
18  
19  
20  
21  
22  
23  
24  
25  
26  
27  
28  
29  
30  
31  
32  
33  
34  
35  
36  
37  
38  
39  
40  
41  
42  
43  
44  
45  
46  
47  
48  
49  
50  
51  
52  
53  
54  
55  
56  
57  
58  
59  
60

If the reviews contain the same trials, then the assessor moves to Step D – assess whether the reviews are the same methodological quality. We will either (a) extract the risk of bias/quality assessments from the overview if the overview used AMSTAR [30], AMSTAR 2 [31], or ROBIS [32]. If the overview authors used any other tool or method to assess the risk of bias/quality of the reviews or did not assess the risk of bias/quality assessment at all, we will conduct our own assessment using the ROBIS tool [32].

### 3.7.4 Step E – Assess and compare data extraction, clinical heterogeneity, and data synthesis

If the reviews are the same risk of bias/quality, then the next step is Step E, to assess and compare data extraction, clinical heterogeneity, and data synthesis across the reviews.

#### Step E1 - Assess and compare the data extraction methods across reviews

For this step, Jadad states, “If reviews differ [in outcomes reported], the decision-maker should identify the review that takes into account the outcome measures most relevant to the problem that he or she is solving.” We interpret this step as selecting the review that (A) matches the overview’s primary outcome.

Jadad then writes that reviews that conduct independent extractions by two reviewers are of the highest quality. We therefore decided that reviews that (B) used an independent data extraction process using two review authors should be chosen. If a ROBIS assessment is done, then the latter point will be mapped to ROBIS 3.1. “Were efforts made to minimise error in data collection?”

Decision rules:

- #1. Reviews that meet criteria A and B are highest in our hierarchy
- #2. Reviews that meet criteria A are second highest in our hierarchy
- #3. Reviews that meet criteria B are third highest in our hierarchy

#### Step E2 – Assess and compare clinical heterogeneity of the included RCTs across reviews

Clinical heterogeneity is assessed at the review level by examining the research question pertaining to the primary outcome and the eligibility criteria PICO elements of each included RCT to see if they are sufficiently similar. If the PICO across RCTs are similar, then clinical heterogeneity is minimal, and reviews can progress with pooling study results in a meta-analysis. If a ROBIS assessment is done, this question is mapped to ROBIS 4.3 “Was the synthesis appropriate given

1  
2 the nature and similarity in the research questions, study designs, and outcomes across included  
3 SRs?"

4  
5  
6  
7 If a review states that (A) they assessed for clinical (e.g., PICO) heterogeneity across RCTs (in the  
8 methods or results sections), then this will be the review that is chosen at this step. Example of a  
9 review reporting a clinical heterogeneity assessment: "If we found 3 or more systematic reviews  
10 with similar study populations, treatment interventions, and outcome assessments, we conducted  
11 quantitative analyses (Gaynes 2014)". If authors reported and described clinical heterogeneity in  
12 the manuscript, then rule (B) authors that judged the clinical heterogeneity assessment to be  
13 minimal or low with rationale, will be chosen at this step.  
14  
15  
16  
17  
18

19  
20  
21 Decision rule:

- 22 #1. Reviews that meet criteria A and B are highest in the hierarchy  
23 #2. Reviews that meet criteria A are second highest in our hierarchy  
24  
25  
26

### 27 **Step E3 – Assess and compare data analysis methods across reviews**

28  
29 Jadad et al. are purposefully vague when describing how to judge whether a meta-analysis was  
30 appropriately conducted. For this step, we interpret it as reviews reported conducting an: (A)  
31 appropriate weighted technique to combine study results (i.e. used a fixed or random random-  
32 effects model) and (B) whether authors conducted an investigation of statistical heterogeneity (i.e.  
33 by reporting  $I^2$ ,  $\tau^2$ , or  $\chi^2$ ) (**Figure 2**).  
34  
35  
36  
37  
38

39 Decision rules for if the presence or absence of heterogeneity is present in the meta-analysis:

- 40 #1. Reviews that meet criteria A and B are highest in our hierarchy  
41 #2. Reviews that meet criteria A only are second highest in our hierarchy  
42 #3. Reviews that meet criteria B only are third highest in our hierarchy (this decision can be  
43 ignored if heterogeneity is not observed)  
44  
45  
46  
47  
48

### 49 **Decision rules for Step E.**

- 50 #1. Reviews that meet Step E1, E2, and E3 are highest in our hierarchy  
51 #2. Reviews that meet Step E1 and E2 second highest in our hierarchy  
52 #3. Reviews that meet Step E1 third highest in our hierarchy  
53 #4. Reviews that meet Step E2 and E3 fourth highest in our hierarchy  
54  
55  
56  
57  
58  
59  
60

1  
2 #5. Reviews that meet Step E2 fifth highest in our hierarchy

3  
4 #6. Reviews that meet Step E3 sixth highest in our hierarchy

5  
6 Note: Reporting only Steps E1, E2 or E3 is not considered a systematic approach to evidence  
7 synthesis.  
8  
9

### 10 11 **3.7.5 Step F - Select the review with the lowest risk of bias, or the highest quality**

12 From the risk of bias/quality assessment conducted through Step D, we will choose the review with the  
13 lowest risk of bias judgement, or highest quality assessment rating. ROBIS contains a last phase where  
14 reviewers are asked to summarise concerns identified in each domain and describe whether the  
15 conclusions were supported by the evidence. Based on these last decisions, a final review rating will be  
16 made based on high, low or unclear risk of bias. For our Jadad assessment, we will choose a binary  
17 rating of either high risk or low risk of bias. Any reviews assessed as 'Unclear' risk of bias will be  
18 deemed as high risk. When using the assessments of risk of bias/quality of reviews from the included  
19 overviews, we will choose the rating of the authors. If uncertainty exists, we will re-assess the included  
20 reviews using ROBIS.  
21  
22  
23  
24  
25  
26  
27  
28

### 29 30 **3.7.6 Step G - Do the reviews have the same eligibility criteria?**

31 If the reviews do not include the same trials, then decision-makers are directed to turn to Step G –  
32 assess whether the reviews have the same eligibility criteria (**Figure 3**). The overview may contain text  
33 in a methods section, or a characteristics of included reviews table where the PICO eligibility criteria  
34 can be extracted and assessed. If this is not the case, then the PICO eligibility criteria will be extracted  
35 from the included reviews by two authors independently and then compared to resolve any  
36 discrepancies.  
37  
38  
39  
40  
41  
42

### 43 44 **2.8.7 Step H - Assess and compare the search strategies and the application of the eligibility criteria 45 across reviews**

46 If the reviews contain the same eligibility criteria, then Step H is to assess and compare the search  
47 strategies and the application of the eligibility criteria across reviews (**Figure 4**).  
48  
49  
50

#### 51 **Step H1 - Assess and compare the search strategies across reviews**

52 In this step, Jadad et al.'s recommendations are vague, although they make reference to  
53 comprehensive search strategies as being less biased. We interpret this step as authors explicitly  
54 describing their search strategy such that it can be replicated. To meet this interpretation, our  
55  
56  
57  
58  
59  
60



1  
2 criteria are that reviews: (A) search 2 or more databases, (B) search the grey literature; and (C)  
3 include a full search algorithm (may be attached as an appendix or included in the manuscript).  
4  
5  
6

7 **Decision rules:**

- 8  
9 #1. Reviews that meet criteria A, B and C are highest in our hierarchy  
10 #2. Reviews that meet criteria A and B are second highest in our hierarchy  
11 #3. Reviews that meet criteria A and C are third highest in our hierarchy  
12 #4. Reviews that meet criteria B and C are fourth highest in our hierarchy (unlikely scenario)  
13 #5. Reviews that meet criteria A only are fifth highest in our hierarchy  
14  
15  
16  
17  
18

19 **SCENARIOS for Step H1**

- 20  
21 • 3 reviews are identified for our Jadad assessment

22 Criteria to choose a systematic review at Step H1: (A) 2 or more databases – (B) searched grey  
23 literature --(C) full search in appendix  
24  
25  
26

27 **Scenario 1**

28 Review 1: A and B, but not C (decision rule #2)

29 Review 2: A and B but not C (decision rule #2)

30 Review 3: A and C, but not B (decision rule #3)

31 Conclusion: No review meets ALL of our criteria; which do we choose? Based on our decision rules,  
32 we choose **BOTH** Review 1 and 2  
33  
34  
35  
36  
37  
38

39 **Scenario 2**

40 Review 1: A, but neither B nor C (decision rule #5)

41 Review 2: A and B, but not C (decision rule #2)

42 Review 3: Neither A, B, nor C (does not report the search methods)

43 Conclusion: No review meets ALL of our criteria; which do we choose? Based on our decision rules,  
44 we choose Review 2  
45  
46  
47  
48  
49  
50

51  
52 **Step H2 - Assess and compare the application of the eligibility criteria across reviews**

53 In this sub-step, Jadad indicates that we should choose the review with the most explicit and  
54 reproducible inclusion criteria, which is ambiguous. Jadad states, “Reviews with the same  
55  
56  
57  
58  
59  
60

1  
2 selection criteria may include different trials because of differences in the application of the  
3 criteria, which are due to random or systematic error. Decision-makers should regard as more  
4 rigorous those reviews with explicit, reproducible inclusion criteria. Such criteria are likely to  
5 reduce bias in the selection of studies” [16]. We did not know if this meant clearly reproducible  
6 PICO eligibility criteria, as this would be a repeat to Step G, whether the eligibility criteria were  
7 applied consistently by reviews (i.e. compare eligibility criteria to included RCTs’ PICO to see if  
8 they indeed met the eligibility criteria), or if this meant (A) independently screening of title,  
9 abstracts, and full text against the eligibility criteria by two reviewers. We selected the latter  
10 criteria when choosing from the included reviews in an overview.  
11  
12  
13  
14  
15  
16  
17  
18

19 Decision rules:

20 #1. Reviews that meet criteria A is highest in our hierarchy  
21  
22  
23

#### 24 **Decision rules for Step H:**

25 #1. Reviews that meet Step H1 and H2 highest in our hierarchy

26 #2. Reviews that meet Step H1 second highest in our hierarchy

27 #3. Reviews that meet Step H2 third highest in our hierarchy  
28  
29  
30  
31

### 32 **3.7.8 Step I – Assess and compare the publication status, quality, language restrictions of the included 33 RCTs, and analysis of data on individual patients**

34 If the reviews do not have the same eligibility criteria, then the next step, Step I, is to assess and  
35 compare the publication status, quality, language restrictions of the included RCTs, and analysis of data  
36 on individual patients across the reviews (**Figure 5**). This step maps to ROBIS item 1.5, namely, “Were  
37 any restrictions in eligibility criteria based on appropriate information sources (e.g. publication status  
38 or format, language, availability of data) [32]?”  
39  
40  
41  
42  
43  
44  
45

#### 46 **Step I1 – Assess and compare the publication status of the included RCTs across reviews**

47 In the absence of clear guidance, we interpret this step as “choose the review that searches for  
48 and includes both published and unpublished data (grey literature).” Published studies are defined  
49 as any study or data published in a peer-reviewed medical journal. Unpublished data is defined as  
50 any information that is difficult to locate and obtained from non-peer-reviewed sources such as  
51 websites (e.g. World Health Organisation website, CADTH), clinical trial registries (e.g.  
52 clinicaltrials.gov), thesis and dissertation databases, and other unpublished data registries (e.g.  
53  
54  
55  
56  
57  
58  
59  
60

1  
2 LILIACS). Our interpretation is that reviews are chosen at this step that search for: (A) studies  
3 published in peer-reviewed medical journals, and (B) reports/documents/content that are not  
4 published in medical journals.  
5  
6  
7

8  
9 Decision rules:

10 #1. Reviews that meet criteria A and B are highest in our hierarchy

11 #2. Reviews that meet criteria A are second highest in our hierarchy

12 #3. Reviews that meet criteria B are third highest in our hierarchy

13 Note: Reporting only A or B is not considered a systematic search.  
14  
15  
16  
17  
18

### 19 **Step I2 – Assess and compare the methods used to assess the quality of the included RCTs across** 20 **reviews**

21  
22 In this step, the Jadad paper recommends assessing the appropriateness of the *methods used to*  
23 assess the quality of the included RCTs across reviews. This item maps to ROBIS item 3.4, “Was  
24 the risk of bias/quality of RCTs formally assessed using appropriate criteria?” Here we interpret  
25 this item as to whether the review authors used the Cochrane risk of bias tool (version 1 or 2). All  
26 other RCT quality assessment tools are inappropriate because they are out of date and omit  
27 important biases (e.g. Agency for Healthcare Research and Quality (AHRQ) 2012 [33] omits  
28 allocation concealment). However, the Cochrane risk of bias tool was only published in October  
29 2008. Therefore, we applied a decision rule: for reviews dated 2012 (giving one year for  
30 awareness of the tool to reach researchers) and later, the Cochrane risk of bias tool is considered  
31 the gold standard. For reviews dated 2009 or earlier, we considered the Jadad scale [34] and  
32 Schulz [35] to be the most common scales used between 1995 and 2011. Other tools will be  
33 considered on a case-by-case basis.  
34  
35  
36  
37  
38  
39  
40  
41  
42  
43

44 As a decision hierarchy, to meet the minimum criteria for this step, a review will have (A)  
45 assessed the risk of bias of RCTs using any tool or approaches, and (B) used the Cochrane risk of  
46 bias tool version 1 or 2 (if dated 2009 or later). If several reviews are included that meet these  
47 two criteria, the review that (C) integrates the risk of bias assessments into the results or  
48 discussion section (i.e. discusses the risk of bias in terms of high and low risk of bias studies,  
49 reports a subgroup or sensitivity analysis) will be chosen.  
50  
51  
52  
53

54  
55  
56 Decision rules:  
57  
58  
59  
60

- 1
- 2 #1. Reviews that meet criteria A, B and C are highest in our hierarchy
- 3
- 4 #2. Reviews that meet criteria B and C are second highest in our hierarchy
- 5
- 6 #3. Reviews that meet criteria A and B are third highest in our hierarchy
- 7
- 8 #4. Reviews that meet criteria A and C are fourth highest in our hierarchy (unlikely scenario)
- 9
- 10 #5. Reviews that meet criteria A only are fifth highest in our hierarchy
- 11

### **SCENARIOS for Step I2**

- 14 • 3 reviews are identified for our Jadad assessment

#### **Scenario 1**

19 Review 1: A and B but not C (decision rule #3)

20 Review 2: A and B but not C ( decision rule #3)

21 Review 3: A and C, but not B (decision rule #4)

22 Conclusion: No review meets ALL of our criteria; which do we choose? Based on our decision rules,  
23 we choose BOTH Review 1 and 2

#### **Scenario 2**

29 Review 1: A, but neither B nor C (decision rule #5)

30 Review 2: A and B, but not C (decision rule #3)

31 Review 3: Neither A, B, nor C (does not report the search methods)

32 Conclusion: No review meets ALL of our criteria; which do we choose? Based on our decision rules,  
33 we choose Review 2

### **Step 13 - Assess and compare any language restrictions across reviews**

44 In this step, Jadad indicates that reviews with (A) no language restrictions in eligibility criteria  
45 should be prioritised and chosen over those that only include English language RCTs. This step  
46 maps to ROBIS item 1.5, namely, “Were any restrictions in eligibility criteria based on sources of  
47 info appropriate (e.g. publication status or format, language, availability of data)?”

51 Decision rule:

- 52 #1. Reviews that meet criteria A are highest in our hierarchy
- 53
- 54
- 55
- 56
- 57
- 58
- 59
- 60

## Step I4 – Choose the analysis of data on individual patients

If (A) an individual patient data meta-analysis was identified in the overview, Jadad et al. recommend this review be chosen over reviews with pairwise meta-analysis.

Decision rule:

#1. Reviews that meet criteria A are highest in our hierarchy

### Decision rules for Step I:

#1. If there is an IDP meta-analysis (Step I4), then this review is the highest in our hierarchy

#2. Reviews that meet Step I1, I2, and I3 are second highest in our hierarchy

#3. Reviews that meet Step I1 and I2 third highest in our hierarchy

#4. Reviews that meet Step I2 and I3 fourth highest in our hierarchy

#5. Reviews that meet Step I1 and I3 fifth highest in our hierarchy

#6. Reviews that meet Step I1 is sixth highest in our hierarchy

#7. Reviews that meet Step I2 is seventh highest in our hierarchy

#8. Reviews that meet Step I3 is eighth highest in our hierarchy

Note: Reporting only Steps I1, I2 or I3 is not considered a systematic approach to evidence synthesis.

## 3.8 Study outcomes

### 3.8.1 Evaluation of whether the overview authors:

- Used the Jadad decision tree to assess discordance
- Examine and record reasons for discordance (i.e. authors did not use Jadad)
- Use other approaches to deal with discordance (specify)
- Present discordance in tables and figures.

### 3.8.2 Results from our discordance assessment and overview authors assessments:

- Utility: Is the Jadad decision tree easy to use? (see section 2.9.3)
- Efficiency: How much time does it take to do one Jadad assessment?
- Comprehensiveness: is the Jadad algorithm comprehensive? Is it missing methods that might explain discordance (e.g. publication recency)?
- Jadad cohort: Frequency of discordant or concordant Jadad assessments between (a) overview authors assessment, and (b) our assessment (i.e. choosing the same SR).

- Non-Jadad cohort: Frequency of discordant or concordant discordance assessments between (a) overview authors assessment, and (b) our assessment (i.e. choosing the same SR).
- Comparison of overview authors stated sources of discordance and our identified sources of discordance.

### 3.8.3 “Ease of use” outcome measure

Each Jadad assessment will be assessed for “ease of use” by each assessor. Each Jadad assessment will be rated and colored (green, yellow, red) based on how easy or difficult the assessment was judged to be for the user. The rating is based on the following rubric:

- The step can be accomplished easily by the reviewer, due to low cognitive load or because it’s a recognised method or approach.
- The step requires a notable degree of cognitive load by the reviewer but can generally be accomplished with some effort.
- The step is difficult for the reviewer, due to significant cognitive load or confusion; some reviewers would likely fail or abandon the task at this point.

The lower the score, the easier the step is to complete.

## 3.9 Data extraction

### 3.9.1 Overview level extraction

The outcomes from section 3.8 will be extracted, along with the following information from the overview:

1. Study characteristics (lead author’s name, publication year).
3. Research question (objectives, health condition of treatment, PICO eligibility criteria: participant, intervention/comparison, and primary outcome).
4. Methods (how the overview authors assessed discordance among the reviews [Jadad or other approach], how they operationalised Jadad, steps where they identified discordance, number of included SRs, type of SR (e.g. individual patient data meta-analysis, SR with narrative summary, SR with meta-analysis of RCTs), type of analysis (narrative summary or meta-analysis), risk of bias/quality assessment (e.g. AMSTAR, AMSTAR 2, or ROBIS tool), risk of bias judgments, and whether risk of bias/quality assessment was integrated into the synthesis.

- 1
  - 2
  - 3
  - 4
  - 5
  - 6
  - 7
  - 8
  - 9
  - 10
  - 11
  - 12
  - 13
  - 14
  - 15
  - 16
  - 17
  - 18
  - 19
  - 20
  - 21
  - 22
  - 23
  - 24
  - 25
  - 26
  - 27
  - 28
  - 29
  - 30
  - 31
  - 32
  - 33
  - 34
  - 35
  - 36
  - 37
  - 38
  - 39
  - 40
  - 41
  - 42
  - 43
  - 44
  - 45
  - 46
  - 47
  - 48
  - 49
  - 50
  - 51
  - 52
  - 53
  - 54
  - 55
  - 56
  - 57
  - 58
  - 59
  - 60
5. Results (results of discordance assessment, effect size and confidence intervals (CIs), number of total participants in treatment and control groups, number of total events in treatment and control groups), direction of study results (favourable or not favourable).
  6. Conclusions (difference between results and conclusions defined as if they disagreed in direction (results, not favourable; conclusions, favourable), authors' result interpretation (quote from abstract and discussion section about the primary outcome result and conclusion)).

### 3.9.2 Direction of effect, the magnitude of effect, and statistical significance

We defined direction of effect, the magnitude of effect, and statistical significance according to Jadad's definitions [16], namely:

- Direction of effect: One review favours the intervention, and another favours the comparison
- Magnitude of effect: To interpret the effect of an intervention in terms of whether it is sufficiently large to be termed clinically significant, we must describe the magnitude of the effect of the intervention. Effect size is a quantitative measure of the magnitude of the experimental effect. The larger the effect size, the stronger the relationship between the two variables. When two reviews differ in the magnitude of effect, one might have an effect estimated at a 30% reduction in mortality, where a second has a 5% reduction in mortality.
- Statistical significance indicates the probability associated with the null hypothesis, but it does not determine whether the result is important, meaningful, substantive, large enough to care about, or clinically significant. The p-value incorporates information about both the sample size and effect size, and thus interpretation, comparison of statistical significance across reviews with different sample sizes, and effect estimates is tricky. For example, if one study yielded a p-value of 0.05 and another yielded a p-value of 0.01, then in the absence of any additional information, a knowledge user might assume that the effect size was stronger in the latter case. In fact, though, if the study with a  $p = 0.05$  used a sample of 10 per group and the second ( $p = 0.01$ ) used 50 per group, then the effect size would have been substantially larger in the study with the modest p-value (a 40-point effect as compared with a 25-point effect).

### 3.9.3 SR level extraction

The outcomes from section 3.8 will be extracted, along with the following information from the included SRs:

1. Study characteristics (lead author's name, publication year).

2. Research question (objectives, health condition of treatment, PICO eligibility criteria: participant, intervention/comparison, and primary outcome; language restrictions and restrictions on publication status in eligibility criteria; citation of previous SRs/meta-analyses in background or discussion).
3. Search methodology (the name and number of databases searched, grey literature search details, the search period, language restrictions, restrictions on publication status, included full search in an appendix).
4. Methods (number and first author/year of included RCTs, effect metric (OR, RR, MD) and CIs, whether review authors assessed the clinical (PICO) heterogeneity across RCTs (in the methods or results sections), analysis method (appropriate weighted technique to combine study results [i.e. used a fixed or random random-effects model], investigation of statistical heterogeneity [i.e. by reporting  $I^2$ ,  $\tau^2$  or  $\chi^2$ ], and if heterogeneity is present, then the authors investigated the causes of any heterogeneity [i.e. by reporting subgroup, sensitivity, or meta-regression analyses]), risk of bias/quality assessment (e.g. Cochrane risk of bias tool v1 or v2), risk of bias/quality judgment for each RCT, and whether the RCT quality/risk of bias assessment was integrated into the synthesis; 2 reviewers independently screened studies, extracted data and assessed risk of bias with process for resolving discrepancies found when comparing).
5. Results (effect size and CI, number of total participants in treatment and control groups, number of total events in treatment and control groups), direction of study results (favourable or not favourable).
6. Conclusions (difference between results and conclusions defined as if they disagreed in direction (results, not favourable; conclusions, favourable), authors' result interpretation (quote from abstract and discussion section about the primary outcome result and conclusion)).

Two authors will extract studies independently at full-text, and in the case of discrepant decisions, will discuss until consensus is reached.

### 3.10 Data analysis

We will assess and compare our outcomes (a) narratively for qualitative data, (b) using frequencies and percentages for categorical data, and (c) using median and interquartile range (IQR) for continuous data." Our analysis will be organised by our study outcomes in tables and in figures. We will discuss differences in the assessment of discordance across overviews using Jadad and overviews not using Jadad.



#### 4.0 PATIENT AND PUBLIC INVOLVEMENT

Patients or the public were not involved in the design of our research protocol.

#### 5.0 ETHICS, DISSEMINATION, STRENGTHS AND LIMITATIONS

##### 5.1 Ethics

No ethics approval was required as no human subjects were involved.

##### 5.2 Dissemination

We will disseminate evidence summaries through academic and social media platforms and websites (e.g. Twitter, Researchgate). We will publish in an open-access journal, and present at various formal and informal venues such as the Therapeutics Initiative Methods Speaker Series, and academic conferences such as Guidelines International Network conference, Cochrane Colloquium, and Public Health.

##### 5.3 Strengths and limitations

We aim to use a systematic approach to evaluate authors' assessment of discordance across SRs in overviews and replicate Jadad algorithm assessments from a sample of overviews. We suspect that one reason for the inconsistent use of the Jadad algorithm in the existing literature may be due to the limited guidance available in the original Jadad manuscript on implementing the algorithm. We believe the greatest strength of the proposed study will be that we used an iterative process among authors to develop decision rules for the interpretation and application of each step in the Jadad algorithm. Upon completion and dissemination of this study, other overview authors will have more detailed guidance on how to apply the Jadad algorithm when addressing discordance in overviews. Furthermore, our study adopted a systematic and transparent approach to address the objectives outlined in our protocol using systematic review guidance [20]. A comprehensive search strategy, including a search of the grey literature, was employed with no restrictions to overviews' language and publication status to yield relevant studies and minimise publication bias. To minimise error, screening, extractions, and assessments will be completed by two independent reviewers, and subsequently compared. Any discrepancies will be resolved upon consensus, and if necessary, with the involvement of a third reviewer. To mitigate observer bias, reviewers were blinded to the overviews' Jadad assessments.

Despite several strengths, this study also has limitations that are to be noted. Due to the feasibility of operationalising this study, only the first 30 eligible overviews will be included. In

1  
2 addition, by only focusing on overviews specific to health interventions, we may potentially have  
3 overlooked a number of relevant overviews that may have assessed discordance and/or employed the  
4 Jadad algorithm. When utilising the tools for assessment (i.e. risk of bias tools or Jadad decision tree),  
5 there will be subjectivity in the judgements potentially introducing variability in the results. To  
6 overcome this limitation, pilot screening and pilot assessments will be completed by reviewers and  
7 assessed to ensure consistency in understanding of the screening criteria, definitions of extracted items,  
8 and steps in the Jadad assessment.  
9  
10  
11  
12  
13  
14

15  
16 Some steps in the Jadad algorithm were vague in description (e.g. step I2), making it difficult to  
17 interpret. For example, step I2 assesses the methods used to assess the quality of included RCTs across  
18 reviews. Some authors could interpret this as assessing if review authors used the Cochrane risk of bias  
19 to assess the quality of RCTs across review. However, the Cochrane risk of bias tool was only  
20 published in 2008. To minimise the incorrect interpretation of this step, we solicited feedback at the  
21 protocol stage from all authors in its interpretation prior to piloting. Thus, after discussion with authors,  
22 we applied a decision rule that for reviews dates 2009 and earlier, we considered the Jadad scale and  
23 allocation concealment to be the most common scale between 1995 and 2009, in addition to other tools  
24 being considered on a case-by-case basis. This was done for all steps. Additionally, during piloting we  
25 will amend our interpretation and instructions on how to operationalise the Jadad algorithm to ensure  
26 consistent application.  
27  
28  
29  
30  
31  
32  
33  
34  
35  
36  
37  
38  
39  
40  
41  
42  
43  
44  
45  
46  
47  
48  
49  
50  
51  
52  
53  
54  
55  
56  
57  
58  
59  
60

**Figure legend**

Figure 1. Jadad (1997) decision tree. Legend: Step A is to examine the multiple reviews matching the overviews' question using a PICO framework. If the research questions are not identical, then step B indicates choosing the review closest to the decision makers' research question and no further assessment is necessary. If multiple reviews are found with the same PICO, then step C should be investigated.

Figure 2. Our Approach to Operationalizing Step E of the Jadad Algorithm

Figure 3. Our Approach to Operationalising Step G of the Jadad Algorithm

Figure 4. Our Approach to Operationalising Step H of the Jadad Algorithm

Figure 5. Our Approach to Operationalising Step I of the Jadad Algorithm

**Declarations**

No declarations.

**Consent for publication**

Not applicable

**Availability of data and materials**

Not applicable

**Competing interests**

The authors declare that they have no competing interests.

**Funding**

No grants or funding were successful for this important study. Dr. Andrea Tricco currently holds a Tier 2 Canada Research Chair in Knowledge Synthesis and an Ontario Ministry of Research and Innovation Early Researcher Award. Dr. Carole Lunny is funded by a CIHR project grant for her postdoctoral research.

1  
2  
3  
4 **Authors' contributions**

5 CL conceived of the study; all authors contributed to the design of the study; All authors edited the  
6 manuscript; and all authors read and approved the final manuscript.  
7  
8  
9  
10  
11  
12  
13  
14  
15  
16  
17  
18  
19  
20  
21  
22  
23  
24  
25  
26  
27  
28  
29  
30  
31  
32  
33  
34  
35  
36  
37  
38  
39  
40  
41  
42  
43  
44  
45  
46  
47  
48  
49  
50  
51  
52  
53  
54  
55  
56  
57  
58  
59  
60

## References

1. Bastian H, Glasziou P, Chalmers IJ: **Seventy-five trials and eleven systematic reviews a day: how will we ever keep up?** 2010, *BMJ*, **7(9)**:e1000326.
2. Taito S, Kataoka Y, Ariie T, Oide S, Tsujimoto Y: **Assessment of the Publication Trends of COVID-19 Systematic Reviews and Randomized Controlled Trials.** *Annals of Clinical Epidemiology* 2021, **3(2)**:56-58.
3. Niforatos JD, Weaver M, Johansen ME: **Assessment of Publication Trends of Systematic Reviews and Randomised Clinical Trials, 1995 to 2017.** *JAMA Internal Medicine* 2019, **179(11)**:1593-1594.
4. Becker LA, Oxman, A.D.: **Chapter 22: Overviews of reviews.** In: *Cochrane Handbook for Systematic Reviews of Interventions*. edn. Edited by Higgins JPT GSE. Hoboken, NJ: John Wiley & Sons; 2008: 607-631.
5. Pieper D, Antoine SL, Mathes T, Neugebauer EA, Eikermann M: **Systematic review finds overlapping reviews were not mentioned in every other overview.** *J Clin Epidemiol* 2014, **67(4)**:368-375.
6. Pieper D, Mathes T, Eikermann M: **Impact of choice of quality appraisal tool for systematic reviews in overviews.** *J Evid Based Med* 2014, **7(2)**:72-78.
7. Smith V, Devane D, Begley CM, Clarke M: **Methodology in conducting a systematic review of systematic reviews of healthcare interventions.** *BMC Med Res Methodol* 2011, **11(1)**:15.
8. Caird J, Sutcliffe K, Kwan I, Dickson K, Thomas J: **Mediating policy-relevant evidence at speed: are systematic reviews of systematic reviews a useful approach?** *Evidence & Policy: A Journal of Research, Debate and Practice* 2015, **11(1)**:81-97.
9. Hunt H, Pollock A, Campbell P, Estcourt L, Brunton GJSr: **An introduction to overviews of reviews: planning a relevant research question and objective for an overview.** 2018, **7(1)**:39.
10. Ioannidis JPA: **The Mass Production of Redundant, Misleading, and Conflicted Systematic Reviews and Meta-analyses.** *The Milbank quarterly* 2016, **94(3)**:485-514.
11. Lunny C, Brennan SE, McDonald S, McKenzie JE: **Toward a comprehensive evidence map of overview of systematic review methods: paper 1-purpose, eligibility, search and data extraction.** *Syst Rev* 2017, **6(1)**:231.
12. Lunny C, Brennan SE, McDonald S, McKenzie JE: **Toward a comprehensive evidence map of overview of systematic review methods: paper 2-risk of bias assessment; synthesis, presentation and summary of the findings; and assessment of the certainty of the evidence.** *Syst Rev* 2018, **7(1)**:159.
13. Bolland MJ, Grey A: **A case study of discordant overlapping meta-analyses: vitamin d supplements and fracture.** *PloS one* 2014, **9(12)**:e115934.
14. Campbell J, Bellamy N, Gee T: **Differences between systematic reviews/meta-analyses of hyaluronic acid/hyaluronan/hylan in osteoarthritis of the knee.** *Osteoarthritis and cartilage / OARS, Osteoarthritis Research Society* 2007, **15(12)**:1424-1436.
15. Chalmers PN, Mascarenhas R, Leroux T, Sayegh ET, Verma NN, Cole BJ, Romeo AA: **Do arthroscopic and open stabilisation techniques restore equivalent stability to the shoulder in the setting of anterior glenohumeral instability? a systematic review of overlapping meta-analyses.** *Arthroscopy : the journal of arthroscopic & related surgery : official publication of the Arthroscopy Association of North America and the International Arthroscopy Association* 2015, **31(2)**:355-363.
16. Jadad AR, Cook DJ, Browman GP: **A guide to interpreting discordant systematic reviews.** *CMAJ : Canadian Medical Association journal = journal de l'Association medicale canadienne* 1997, **156(10)**:1411-1416.

17. Li Q, Wang C, Huo Y, Jia Z, Wang X: **Minimally invasive versus open surgery for acute Achilles tendon rupture: a systematic review of overlapping meta-analyses.** *Journal of orthopaedic surgery and research* 2016, **11**(1):65.
18. Mascarenhas R, Chalmers PN, Sayegh ET, Bhandari M, Verma NN, Cole BJ, Romeo AA: **Is double-row rotator cuff repair clinically superior to single-row rotator cuff repair: a systematic review of overlapping meta-analyses.** *Arthroscopy : the journal of arthroscopic & related surgery : official publication of the Arthroscopy Association of North America and the International Arthroscopy Association* 2014, **30**(9):1156-1165.
19. Zhao JG, Wang J, Long L: **Surgical Versus Conservative Treatments for Displaced Midshaft Clavicular Fractures: A Systematic Review of Overlapping Meta-Analyses.** *Medicine* 2015, **94**(26):e1057.
20. Higgins JP: **Cochrane handbook for systematic reviews of interventions version 5.0. 1. The Cochrane Collaboration.** <http://www.cochrane-handbook.org> 2008.
21. Lunny C, Neelakant T, Chen A, Shinger G, Stevens A, Tasnim S, Sadeghipouya S, Adams S, Zheng YW, Lin L: **Bibliometric study of 'overviews of systematic reviews': evaluation of prevalence, citation and impact factor.** 2021.
22. Fabiano GA, Schatz NK, Aloe AM, Chacko A, Chronis-Tuscano A: **A systematic review of meta-analyses of psychosocial treatment for attention-deficit/hyperactivity disorder.** *Clin Child Fam Psychol Rev* 2015, **18**(1):77-97.
23. Finnane A, Janda M, Hayes SC: **Review of the evidence of lymphedema treatment effect.** *American journal of physical medicine & rehabilitation* 2015, **94**(6):483-498.
24. Lau R, Stevenson F, Ong BN, Dziedzic K, Treweek S, Eldridge S, Everitt H, Kennedy A, Qureshi N, Rogers A: **Achieving change in primary care—effectiveness of strategies for improving implementation of complex interventions: systematic review of reviews.** *BMJ open* 2015, **5**(12):e009993.
25. López NJ, Uribe S, Martinez B: **Effect of periodontal treatment on preterm birth rate: a systematic review of meta-analyses.** *Periodontology 2000* 2015, **67**(1):87-130.
26. Moher D, Dulberg CS, Wells GA: **Statistical power, sample size, and their reporting in randomised controlled trials.** *Jama* 1994, **272**(2):122-124.
27. Tricco AC, Tetzlaff J, Pham B, Brehaut J, Moher D: **Non-Cochrane vs. Cochrane reviews were twice as likely to have positive conclusion statements: cross-sectional study.** *J Clin Epidemiol* 2009, **62**(4):380-386.e381.
28. Hróbjartsson A, Thomsen ASS, Emanuelsson F, Tendal B, Hilden J, Boutron I, Ravaud P, Brorson S: **Observer bias in randomised clinical trials with measurement scale outcomes: a systematic review of trials with both blinded and nonblinded assessors.** *CMAJ : Canadian Medical Association journal = journal de l'Association medicale canadienne* 2013, **185**(4):E201-E211.
29. Morissette K, Tricco AC, Horsley T, Chen MH, Moher D: **Blinded versus unblinded assessments of risk of bias in studies included in a systematic review.** *Cochrane Database of Systematic Reviews* 2011(9).
30. Shea BJ, Grimshaw JM, Wells GA, Boers M, Andersson N, Hamel C, Porter AC, Tugwell P, Moher D, Bouter LM: **Development of AMSTAR: a measurement tool to assess the methodological quality of systematic reviews.** *BMC Med Res Methodol* 2007, **7**(1):1-7.
31. Shea BJ, Reeves BC, Wells G, Thuku M, Hamel C, Moran J, Moher D, Tugwell P, Welch V, Kristjansson E: **AMSTAR 2: a critical appraisal tool for systematic reviews that include randomised or non-randomised studies of healthcare interventions, or both.** *bmj* 2017, **358**.
32. Whiting P SJ, Churchill R.: **Introduction to ROBIS, a new tool to assess the risk of bias in a systematic review.** In: *23rd Cochrane Colloquium: 2015; Vienna, Austria*: John Wiley & Sons; 2015.
33. Viswanathan M, Patnode CD, Berkman ND, Bass EB, Chang S, Hartling L, Murad MH, Treadwell JR, Kane RL: **Assessing the risk of bias in systematic reviews of health care**

1  
2  
3  
4  
5  
6  
7  
8  
9  
10  
11  
12  
13  
14  
15  
16  
17  
18  
19  
20  
21  
22  
23  
24  
25  
26  
27  
28  
29  
30  
31  
32  
33  
34  
35  
36  
37  
38  
39  
40  
41  
42  
43  
44  
45  
46  
47  
48  
49  
50  
51  
52  
53  
54  
55  
56  
57  
58  
59  
60

**interventions.** *Methods guide for effectiveness and comparative effectiveness reviews [Internet]* 2017.

34. Jadad AR, Moher D, Klassen TP: **Guides for reading and interpreting systematic reviews: II. How did the authors find the studies and assess their quality?** *Archives of pediatrics & adolescent medicine* 1998, **152**(8):812-817.
35. Schulz KF, Chalmers I, Hayes RJ, Altman DG: **Empirical evidence of bias: dimensions of methodological quality associated with estimates of treatment effects in controlled trials.** *Jama* 1995, **273**(5):408-412.

For peer review only

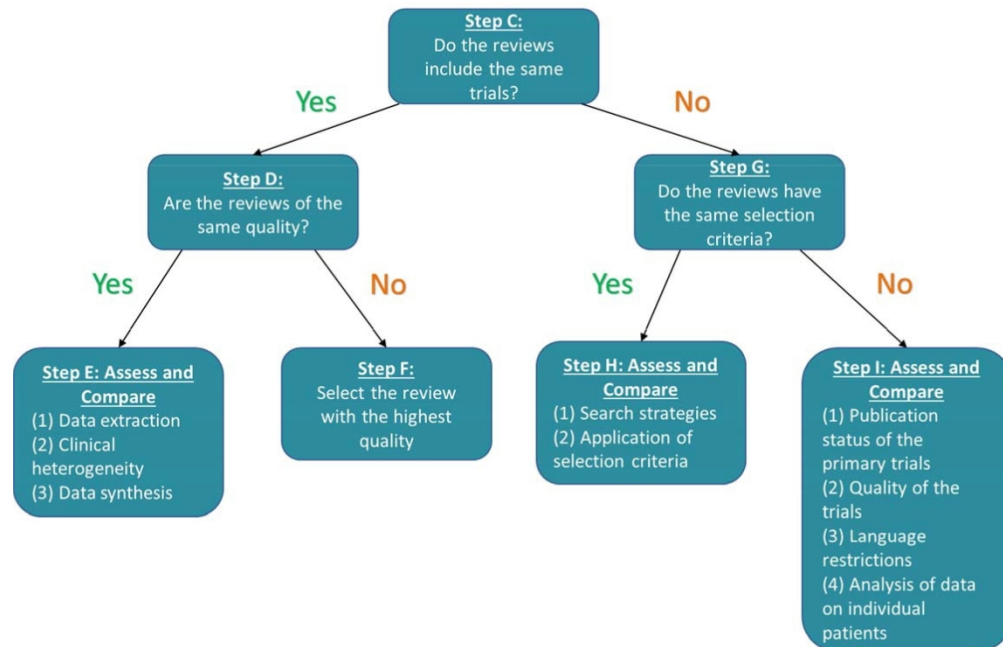

Figure 1. Jadad (1997) decision tree.

Legend: Step A is to examine the multiple reviews matching the overviews' question using a PICO framework. If the research questions are not identical, then step B indicates choosing the review closest to the decision makers' research question and no further assessment is necessary. If multiple reviews are found with the same PICO, then step C should be investigated.

194x132mm (300 x 300 DPI)



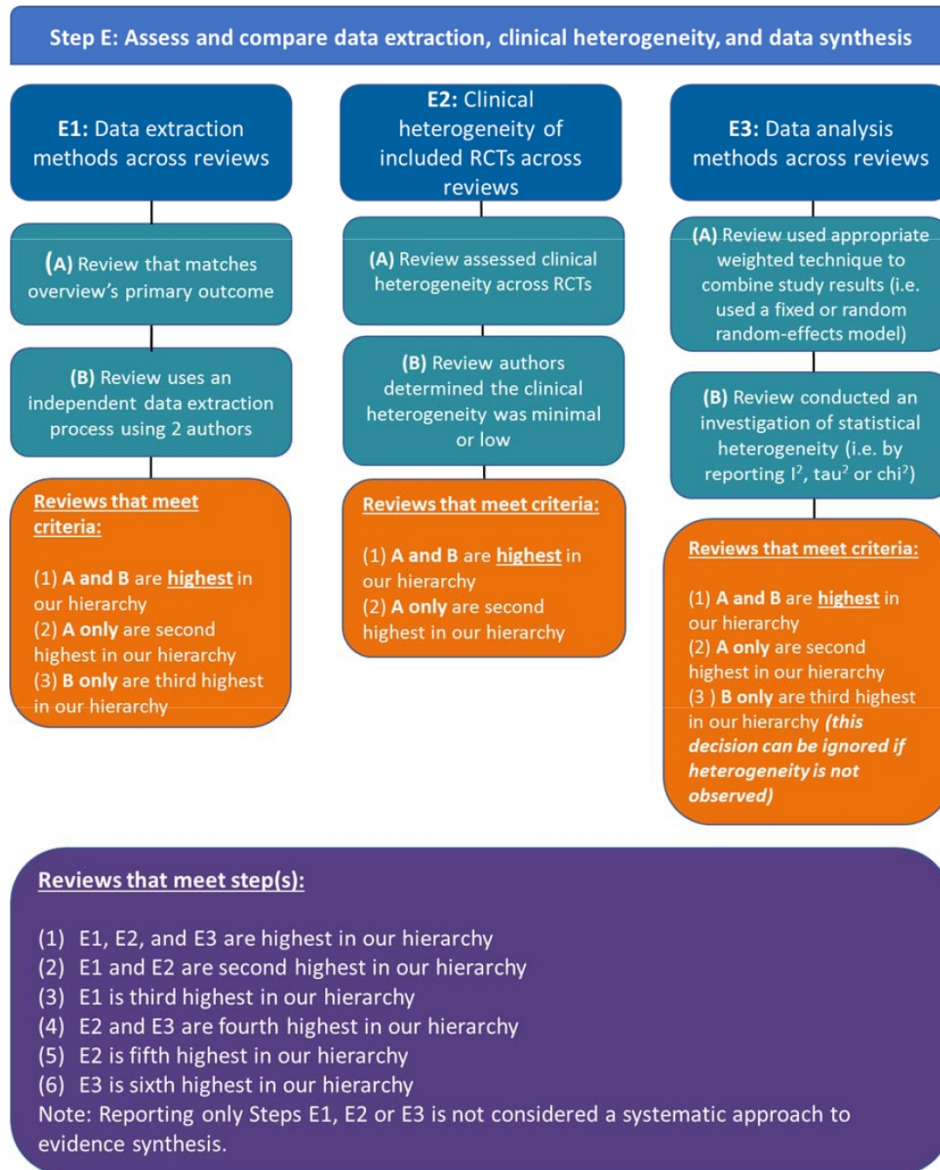

**Figure 2. Our Approach to Operationalizing Step E of the Jadad Algorithm.**

164x208mm (300 x 300 DPI)

1  
2  
3  
4  
5  
6  
7  
8  
9  
10  
11  
12  
13  
14  
15  
16  
17  
18  
19  
20  
21  
22  
23  
24  
25  
26  
27  
28  
29  
30  
31  
32  
33  
34  
35  
36  
37  
38  
39  
40  
41  
42  
43  
44  
45  
46  
47  
48  
49  
50  
51  
52  
53  
54  
55  
56  
57  
58  
59  
60

Step G: Do the reviews have the same eligibility criteria?

PICO eligibility criteria can be extracted and assessed:

P: Population

I: Intervention

C: Comparator

O: Outcome

**Figure 3. Our Approach to Operationalising Step G of the Jadad Algorithm**

160x61mm (300 x 300 DPI)

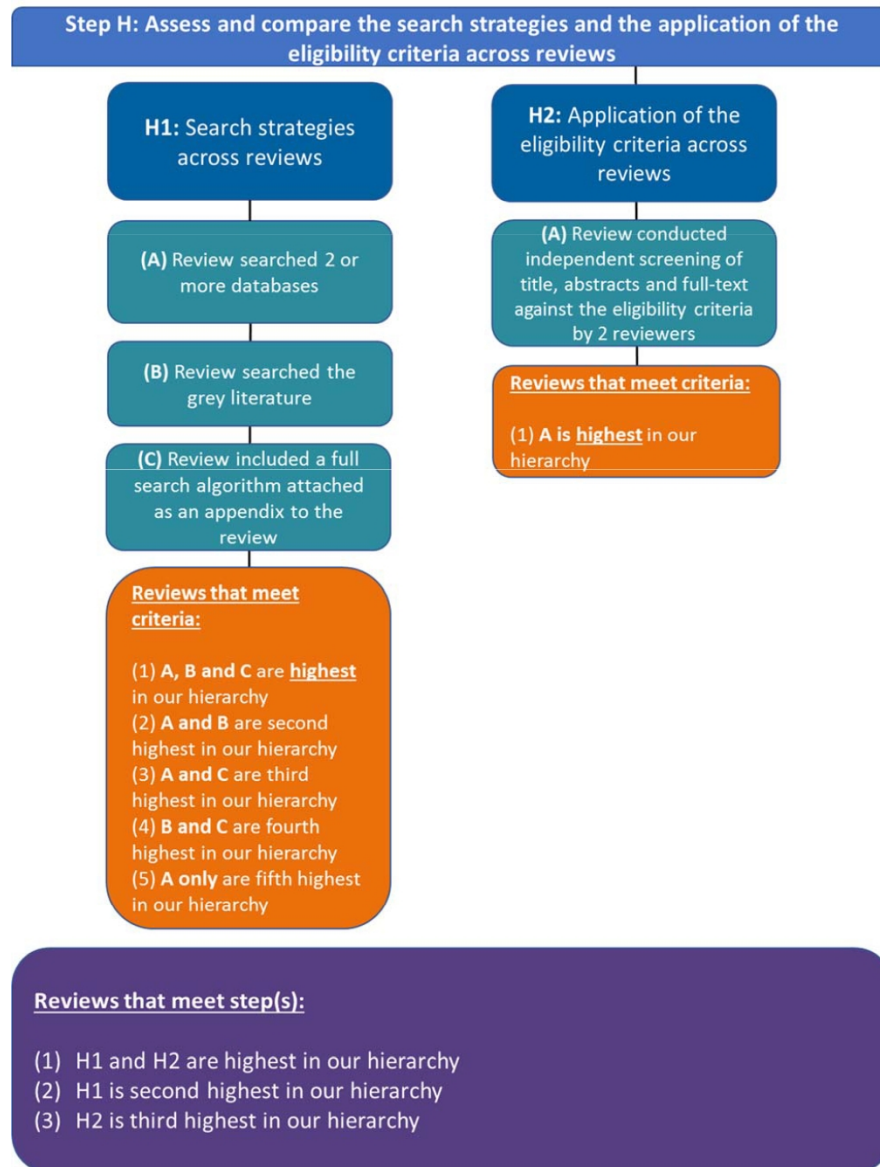

Figure 4. Our Approach to Operationalising Step H of the Jadad Algorithm.

166x226mm (300 x 300 DPI)

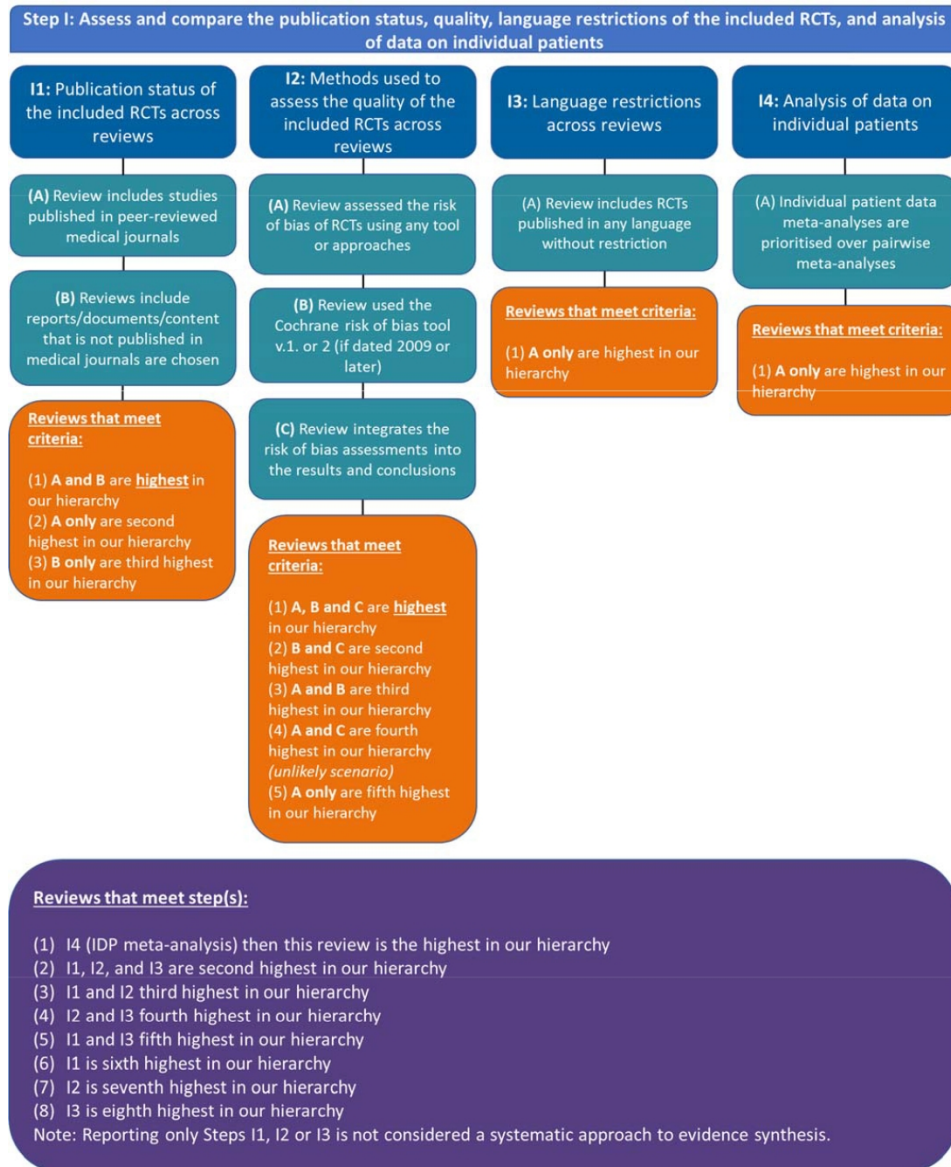

**Figure 5. Our Approach to Operationalising Step I of the Jadad Algorithm.**

175x220mm (300 x 300 DPI)

# BMJ Open

## Identifying and addressing conflicting results across multiple discordant systematic reviews on the same question: Protocol for a replication study of the Jadad algorithm

|                               |                                                                                                                                                                                                                                                                                                                                                                                                                                                                                                                                                                                                                                                                                                                                                                                                                                                                                                                                                                                                                                                                                                                                                                                                                                                                                                                                                                                                                                                                                                                                                                                                                                                                                                                                                                                                                                                                                                                                                                                                                                                                             |
|-------------------------------|-----------------------------------------------------------------------------------------------------------------------------------------------------------------------------------------------------------------------------------------------------------------------------------------------------------------------------------------------------------------------------------------------------------------------------------------------------------------------------------------------------------------------------------------------------------------------------------------------------------------------------------------------------------------------------------------------------------------------------------------------------------------------------------------------------------------------------------------------------------------------------------------------------------------------------------------------------------------------------------------------------------------------------------------------------------------------------------------------------------------------------------------------------------------------------------------------------------------------------------------------------------------------------------------------------------------------------------------------------------------------------------------------------------------------------------------------------------------------------------------------------------------------------------------------------------------------------------------------------------------------------------------------------------------------------------------------------------------------------------------------------------------------------------------------------------------------------------------------------------------------------------------------------------------------------------------------------------------------------------------------------------------------------------------------------------------------------|
| Journal:                      | <i>BMJ Open</i>                                                                                                                                                                                                                                                                                                                                                                                                                                                                                                                                                                                                                                                                                                                                                                                                                                                                                                                                                                                                                                                                                                                                                                                                                                                                                                                                                                                                                                                                                                                                                                                                                                                                                                                                                                                                                                                                                                                                                                                                                                                             |
| Manuscript ID                 | bmjopen-2021-054223.R1                                                                                                                                                                                                                                                                                                                                                                                                                                                                                                                                                                                                                                                                                                                                                                                                                                                                                                                                                                                                                                                                                                                                                                                                                                                                                                                                                                                                                                                                                                                                                                                                                                                                                                                                                                                                                                                                                                                                                                                                                                                      |
| Article Type:                 | Protocol                                                                                                                                                                                                                                                                                                                                                                                                                                                                                                                                                                                                                                                                                                                                                                                                                                                                                                                                                                                                                                                                                                                                                                                                                                                                                                                                                                                                                                                                                                                                                                                                                                                                                                                                                                                                                                                                                                                                                                                                                                                                    |
| Date Submitted by the Author: | 30-Nov-2021                                                                                                                                                                                                                                                                                                                                                                                                                                                                                                                                                                                                                                                                                                                                                                                                                                                                                                                                                                                                                                                                                                                                                                                                                                                                                                                                                                                                                                                                                                                                                                                                                                                                                                                                                                                                                                                                                                                                                                                                                                                                 |
| Complete List of Authors:     | <p>Lunny, Carole; University of Toronto Dalla Lana School of Public Health, Epidemiology Division and Institute for Health Policy, Management, and Evaluation</p> <p>Thirugnanasampanthar, Sai Surabi; University of Toronto Dalla Lana School of Public Health, Epidemiology Division; St Michael's Hospital Li Ka Shing Knowledge Institute, Knowledge Translation Program</p> <p>Kanji, Salmaan; The Ottawa Hospital, Department of Pharmacy; University of Ottawa, Faculty of Medicine</p> <p>Ferri, Nicola; University of Bologna, Department of Biomedical and Neuromotor Sciences</p> <p>Thabet, Pierre; Hôpital Montfort</p> <p>Pieper, Dawid; Witten/Herdecke University, Cologne, Germany</p> <p>Tasnim, Sara; The University of British Columbia Faculty of Medicine, Anesthesiology, Pharmacology &amp; Therapeutics</p> <p>Nelson, Harrison; Queen's University Faculty of Health Sciences</p> <p>Reid, Emma; Nova Scotia Health Authority</p> <p>Zhang, Jia He (Janet); The University of British Columbia</p> <p>Kalkat, Banveer; The University of British Columbia, Faculty of Pharmaceutical Sciences</p> <p>Chi, Yuan; Beijing Yealth Technology Co., Ltd, Yealth Network</p> <p>Thompson, Jacqueline; University of Birmingham Institute of Applied Health Research</p> <p>Abdoulrezzak, Reema; The University of British Columbia, Faculty of Pharmaceutical Sciences</p> <p>Zheng, Di Wen (Wendy); The University of British Columbia, Faculty of Pharmaceutical Sciences</p> <p>Pangka, Lindy; The University of British Columbia, Faculty of Pharmaceutical Sciences</p> <p>Wang, Dian (Xin Ran); The University of British Columbia, Faculty of Pharmaceutical Sciences</p> <p>Safavi, Parisa; The University of British Columbia, Faculty of Pharmaceutical Sciences</p> <p>Sooch, Anmol; The University of British Columbia, Faculty of Pharmaceutical Sciences</p> <p>Kang, Kevin; The University of British Columbia, Faculty of Pharmaceutical Sciences</p> <p>Whitelaw, Sera; McGill University, Faculty of Medicine and Health Sciences</p> |

1  
2  
3  
4  
5  
6  
7  
8  
9  
10  
11  
12  
13  
14  
15  
16  
17  
18  
19  
20  
21  
22  
23  
24  
25  
26  
27  
28  
29  
30  
31  
32  
33  
34  
35  
36  
37  
38  
39  
40  
41  
42  
43  
44  
45  
46  
47  
48  
49  
50  
51  
52  
53  
54  
55  
56  
57  
58  
59  
60

|                                 |                                                                                                                                                                                                                                                      |
|---------------------------------|------------------------------------------------------------------------------------------------------------------------------------------------------------------------------------------------------------------------------------------------------|
|                                 | Tricco, Andrea; Li Ka Shing Knowledge Institute of St Michael's Hospital, Knowledge Translation Program; University of Toronto Dalla Lana School of Public Health, Epidemiology Division and Institute for Health Policy, Management, and Evaluation |
| <b>Primary Subject Heading:</b> | Research methods                                                                                                                                                                                                                                     |
| Secondary Subject Heading:      | Research methods                                                                                                                                                                                                                                     |
| Keywords:                       | PUBLIC HEALTH, STATISTICS & RESEARCH METHODS, EPIDEMIOLOGY                                                                                                                                                                                           |
|                                 |                                                                                                                                                                                                                                                      |

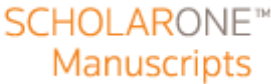

1  
2 1 **Title: Identifying and addressing conflicting results across multiple discordant systematic reviews on**  
3 **the same question: Protocol for a replication study of the Jadad algorithm**  
4 2  
5  
6 3

7 4 **Authors:**  
8

- 9 5 • Lunny C, PhD<sup>1\*</sup>, [carole.lunny@ubc.ca](mailto:carole.lunny@ubc.ca), <https://orcid.org/0000-0002-7825-6765>, St Michael's  
10 6 Hospital, Unity Health Toronto and the Cochrane Hypertension Review Group, University of  
11 7 British Columbia, Vancouver, BC, Canada, V6T 1Z3  
12 8 • Sai Surabi Thirugnanasampanthar, BHSc [Saisurabi.Thirugnanasampanthar@unityhealth.to](mailto:Saisurabi.Thirugnanasampanthar@unityhealth.to),  
13 9 Knowledge Translation Program, Li Ka Shing Knowledge Institute, St. Michael's Hospital,  
14 10 Unity Health and the Dalla Lana School of Public Health, University of Toronto, Toronto, ON,  
15 11 Canada  
16 12 • Kanji S, Pharm.D., [skanji@toh.ca](mailto:skanji@toh.ca), The Ottawa Hospital and Ottawa Hospital Research Institute  
17 13 • Ferri N, PT [Nicola.ferri11@unibo.it](mailto:Nicola.ferri11@unibo.it), Department of Biomedical and Neuromotor Sciences  
18 14 (DIBINEM), Alma Mater Studiorum, University of Bologna, 40138, Bologna, Italy  
19 15 • Thabet P, B. Pharm, [pierrethabet@montfort.on.ca](mailto:pierrethabet@montfort.on.ca), Hôpital Montfort, Ottawa, Canada  
20 16 • Pieper D, PhD, [Dawid.Pieper@mhb-fontane.de](mailto:Dawid.Pieper@mhb-fontane.de), Institute for Research in Operative Medicine,  
21 17 Witten/Herdecke University, Germany  
22 18 • Tasnim S, MSc, [stasnim@mail.ubc.ca](mailto:stasnim@mail.ubc.ca), Cochrane Hypertension Review Group, Therapeutics  
23 19 Initiative, Department of Anesthesiology, Pharmacology & Therapeutics, Faculty of Medicine,  
24 20 University of British Columbia, 2176 Health Science Mall, Vancouver, BC, Canada, V6T 1Z3  
25 21 • Harrison Nelson, [harrison.nelson@queensu.ca](mailto:harrison.nelson@queensu.ca), <https://orcid.org/0000-0001-8306-5448>, Faculty  
26 22 of Health Sciences, Queen's University, Kingston, ON, Canada  
27 23 • Emma Reid, Pharm.D, [emmak.reid@nshealth.ca](mailto:emmak.reid@nshealth.ca), Nova Scotia Health, Halifax, Nova Scotia,  
28 24 Canada  
29 25 • Jia He (Janet) Zhang, BSc, [jiahe.janet@gmail.com](mailto:jiahe.janet@gmail.com), University of British Columbia, Vancouver,  
30 26 BC, Canada  
31 27 • Banveer Kalkat, [banveerk@student.ubc.ca](mailto:banveerk@student.ubc.ca), Faculty of Pharmaceutical Sciences, University of  
32 28 British Columbia, Vancouver, BC, Canada  
33 29 • Yuan Chi. [yuan.chi@outlook.com](mailto:yuan.chi@outlook.com), Beijing Yealth Technology Co., Ltd, Yealth Network,  
34 30 Beijing, China  
35 31 • Jacqueline Y Thompson, MPH [j.y.thompson@bham.ac.uk](mailto:j.y.thompson@bham.ac.uk), [https://orcid.org/0000-0002-9775-](https://orcid.org/0000-0002-9775-361X)  
36 32 [361X](https://orcid.org/0000-0002-9775-361X), Institute of Applied Health Research, University of Birmingham, Edgbaston,  
37 33 Birmingham B15 2TT  
38  
39  
40  
41  
42  
43  
44  
45  
46  
47  
48  
49  
50  
51  
52  
53  
54  
55  
56  
57  
58  
59  
60

1

2

3

4

5

6

7

8

9

10

11

12

13

14

15

16

17

18

19

20

21

22

23

24

25

26

27

28

29

30

31

32

33

34

35

36

37

38

39

40

41

42

43

44

45

46

47

48

49

50

51

52

53

54

55

56

57

58

59

60

61

62

- 34 • Reema Abdoulrezzak, BSc [reemaabd@student.ubc.ca](mailto:reemaabd@student.ubc.ca), Faculty of Pharmaceutical Sciences, University of British Columbia, Vancouver, BC, Canada
- 35
- 36 • Di Wen (Wendy) Zheng, BSc [wendyzhe@student.ubc.ca](mailto:wendyzhe@student.ubc.ca), Faculty of Pharmaceutical Sciences, University of British Columbia, Vancouver, BC, Canada
- 37
- 38 • Lindy R.S. Pangka, BSc [lpangka@shaw.ca](mailto:lpangka@shaw.ca), Faculty of Pharmaceutical Sciences, University of British Columbia, Vancouver, BC, Canada
- 39
- 40 • Dian (Xin Ran) Wang, BSc [dianw@student.ubc.ca](mailto:dianw@student.ubc.ca), Faculty of Pharmaceutical Sciences, University of British Columbia, Vancouver, BC, Canada
- 41
- 42 • Parisa Safavi, BSc [psafavi@student.ubc.ca](mailto:psafavi@student.ubc.ca), Faculty of Pharmaceutical Sciences, University of British Columbia, Vancouver, BC, Canada
- 43
- 44 • Anmol Sooch, BSc [asooch19@student.ubc.ca](mailto:asooch19@student.ubc.ca), Faculty of Pharmaceutical Sciences, University of British Columbia, Vancouver, BC, Canada
- 45
- 46 • Kevin T. Kang, BSc [ktw9412@student.ubc.ca](mailto:ktw9412@student.ubc.ca), Faculty of Pharmaceutical Sciences, University of British Columbia, Vancouver, BC, Canada
- 47
- 48 • Whitelaw S, MSc [sera.whitelaw@mail.mcgill.ca](mailto:sera.whitelaw@mail.mcgill.ca), Faculty of Medicine and Health Sciences, McGill University, Montreal, QC, Canada
- 49
- 50 • Tricco AC, PhD, 1. Knowledge Translation Program, Li Ka Shing Knowledge Institute, St. Michael's Hospital, Unity Health Toronto, 209 Victoria St, M5B 1T8, Toronto, Ontario, Canada.; 2. Epidemiology Division and Institute for Health Policy, Management, and Evaluation, Dalla Lana School of Public Health, University of Toronto, 155 College St Room 500, M5T 3M7, Toronto Ontario, Canada; 3. Queen's Collaboration for Health Care Quality Joanna Briggs Institute Centre of Excellence, School of Nursing, Queen's University, 99 University Ave, K7L 3N6, Kingston, Ontario, Canada

41

42

43

44

45

46

47

48

49

50

51

52

53

54

55

56

57

58

59

60

61

62

\*Corresponding author

Lunny C, PhD<sup>1\*</sup>, [carole.lunny@ubc.ca](mailto:carole.lunny@ubc.ca), <https://orcid.org/0000-0002-7825-6765>, St Michael's Hospital, Unity Health Toronto and the Cochrane Hypertension Review Group, University of British Columbia, Vancouver, BC, Canada, V6T 1Z3



1  
2 63 **ABSTRACT**  
3  
4 64

5  
6 65 **Introduction:** An increasing growth of systematic reviews (SRs) presents notable challenges for  
7 66 decision-makers seeking to answer clinical questions. In 1997, an algorithm was created by Jadad to  
8 67 assess discordance in results across SRs on the same question. Our study aims to (a) replicate  
9 68 assessments done in a sample of studies using the Jadad algorithm to determine if the same SR would  
10 69 have been chosen, (b) evaluate the Jadad algorithm in terms of utility, efficiency, and  
11 70 comprehensiveness, and (c) describe how authors address discordance in results across multiple SRs.  
12  
13  
14  
15  
16 71

17 72 **Methods and Analysis:** We will use a database of 1218 overviews (2000-2020) created from a  
18 73 bibliometric study as the basis of our search for studies assessing discordance (called Discordant  
19 74 Reviews). This bibliometric study searched MEDLINE (Ovid), Epistemonikos, and Cochrane Database  
20 75 of Systematic Reviews for overviews. We will include any study using Jadad (1997) or another method  
21 76 to assess discordance. The first 30 studies screened at the full-text stage by two independent reviewers  
22 77 will be included. We will replicate the authors' Jadad assessments. We will compare our outcomes  
23 78 qualitatively and evaluate the differences between our Jadad assessment of discordance and the  
24 79 authors' assessment.  
25  
26  
27  
28  
29  
30  
31 80

32 81 **Ethics and Dissemination:** No ethics approval was required as no human subjects were involved. In  
33 82 addition to publishing in an open-access journal, we will disseminate evidence summaries through  
34 83 formal and informal conferences, academic websites, and across social media platforms. This is the  
35 84 first study to comprehensively evaluate and replicate Jadad algorithm assessments of discordance  
36 85 across multiple SRs.  
37  
38  
39  
40  
41 86

42 87 **Abstract: 281 words**  
43  
44 88  
45  
46  
47  
48  
49  
50  
51  
52  
53  
54  
55  
56  
57  
58  
59  
60

1

2

3

**89 Strengths and limitations of this study**

4 90

- This is the first proposed empirical study to use a systematic approach to evaluate authors' assessment of discordance across SRs and replicate Jadad algorithm assessments

5 91

6 92

- We believe the greatest strength of the proposed study will be that we used an iterative process among authors to develop decision rules for the interpretation and application of each step in the Jadad algorithm.

7 93

8 94

9 95

10 96

11 97

12 98

13 99

14 100

15

16

17

18

19

20

21

22

23

24

25

26

27

28

29

30

31

32

33

34

35

36

37

38

39

40

41

42

43

44

45

46

47

48

49

50

51

52

53

54

55

56

## 1.0 BACKGROUND

Information overload is an increasing problem for health practitioners, researchers, and decision-makers. Global research output is growing rapidly, and the number of published systematic reviews (SRs) being produced yearly is also expanding [1]. Between January and October 2020, 807 SRs on COVID-19 alone were published in PubMed [2], and the rate of growth from 1995 to 2017 in SRs was found to be 4676% [3]. Challenges in dealing with growth in SRs include identification of high quality, comprehensive, and recent reports on the topic of interest.

‘Overviews of systematic reviews’ (henceforth called overviews) evolved in response to these challenges [4-7]. Overviews summarise the results of SRs, and help make sense of potentially conflicting, discrepant, and overlapping results and conclusions of SRs on the same question [8-15]. Overviews may also include systematic reviews with concordant results; hence we have named studies that identify and explain the discordance between conflicting SRs on the same question as “Discordant Reviews”. These Discordant Reviews are often called systematic reviews of overlapping meta-analyses (e.g. [13, 16]), conflicting results of meta-analyses [17, 18], and discordant meta-analyses [19-21].

We define discordance as when SRs with identical or /very similar clinical, public health or policy questions report different results for the same outcome. A common method for dealing with multiple SRs with discordant results is to specify methodological criteria to select only one SR (e.g., select the highest quality and most comprehensive SR) [12]. However, many other methods have been proposed, including statistical approaches to address discordance in results across SRs [11, 12].

As early as 1997, Jadad et al. [22] developed a decision tree (i.e. an algorithm) to assess discordance in results across a sample of SRs on the same question to aid healthcare providers in making clinical decisions. The Jadad algorithm guides users through a methodological assessment of SR components to identify potential causes of discordance and ultimately choose the best SR across multiple. Jadad et al.’s [22] appears to be the only formal algorithm available to both explain and deal with discordance across SRs. Despite the availability of this tool since 1997, it has not been universally adopted and has been inconsistently applied when used [23-25]. The aim of this study is to comprehensively replicate and evaluate the Jadad algorithm for assessing discordance across SRs.

## 2.0 OBJECTIVES

Our study objectives are:

- 1) Describe how Discordant Reviews address discordance in results across multiple SRs using content analysis (study 1)

- 1  
2 133 2) Replicate Jadad assessments from published Discordant Reviews to identify sources of  
3  
4 134 discordance and to determine if the same SR(s) was chosen as the “best available evidence”  
5  
6 135 (study 2)  
7 136 3) Evaluate the Jadad algorithm in terms of utility, efficiency, and comprehensiveness (study 2)  
8  
9 137

### 10 11 138 3.0 METHODS

#### 12 139 3.1. Study design

14 140 This is a methods study in the knowledge synthesis field. We followed SR guidance for the study  
15  
16 141 selection and data extraction stages [26]. Our protocol will be registered and located on the Open  
17  
18 142 Science Framework at <https://osf.io/nbcta/>.

#### 19 143 20 21 144 3.2 Search and selection of Discordant Reviews

##### 22 145 3.2.1 Database of 1218 overviews

24 146 We will use a database of 1218 overviews published between January 1, 2000 and December 30, 2020  
25  
26 147 created from a bibliometric study [27] as the basis of our search for Discordant Reviews using Jadad or  
27  
28 148 another method to assess discordance. A validated search filter for overviews [28] was used in  
29  
30 149 MEDLINE (Ovid), Epistemonikos, and the Cochrane Database of Systematic Reviews (CDSR) for  
31  
32 150 overviews. In an empirical methods study of the retrieval sensitivity of 6 databases, the combination of  
33  
34 151 MEDLINE and Epistemonikos retrieved 95.2% of all systematic reviews [29]. As a rationale, we  
35  
36 152 believe this combination would retrieve an equal proportion of overviews. The database Epistemonikos  
37  
38 153 contains both published and unpublished reports. We searched the CDSR through the website interface  
39  
40 154 using the filter for Cochrane reviews. Overviews included in the bibliometric study contain these  
41  
42 155 characteristics: (a) synthesised the results of SRs, (b) systematically searched for evidence in a  
43  
44 156 minimum of two databases, and (c) conducted a search using a combination of text words and MeSH  
45  
46 157 terms. The included overviews also had to have a methods section in the main body of the paper and  
47  
48 158 focused on health interventions. To identify studies assessing discordance using the database of 1218  
49  
50 159 overviews, we will use the EndNote search function and Boolean logic to search for the following  
51  
52 160 words: overlap\*[title/abstract] or discrepant\*[title/abstract] or discord\*[title/abstract] or  
53  
54 161 concord\*[title/abstract] or conflict\*[title/abstract] or Jadad [abstract].

##### 56 162 57 58 163 3.2.2 Medline (Ovid) search strategy January to April 2021

59 164 We will update this search with an Ovid MEDLINE search using the following search string:  
60  
61 165 ("systematic reviews".ti,ab. or “meta-analyses”.ti,ab.) AND (overlap.ti,ab or discrepant.ti,ab or  
62  
63 166 discordant.ti,ab. or difference.ti,ab. or conflicting.ti,ab. or Jadad.ab.). Our search was conducted on  
64  
65 167 April 18, 2021.  
66  
67 168

### 3.3 Screening Discordant Reviews

#### 3.3.1 Process for screening Discordant Reviews

Citations identified by our searches will be assigned a random number and screened sequentially. The first 30 Discordant Reviews screened at full-text and meeting our eligibility criteria will be included.

All authors will pilot the screening form on 20 Discordant Reviews to ensure high levels of agreement and common definitions of eligibility criteria.

Two authors will independently screen Discordant Reviews as full-text publications. Discrepancies will be resolved by consensus, and arbitration by a third reviewer when necessary.

#### 3.3.2 Stage 1 screening criteria

We first include all reports aiming to assess discordant results across SRs on the same question. Studies assessing discordance can assess (a) discordant results, or (b) discordant interpretations of the results and conclusions. Both studies examining (a) and (b) were eligible (e.g. [30-33]).

If a study meets stage 1 criteria, it will be included in Study 1.

#### 3.3.3 Stage 2 screening criteria

From this sample, we will then screen Discordant Reviews based on the following inclusion criteria:

- Included a minimum of two SRs with a meta-analysis of randomised controlled trials (RCTs), but may have included other study types beyond RCTs; and
- Used the Jadad algorithm.

If a study meets stage 2 screening, it will move onto stage 3 screening.

#### 3.3.4 Stage 3 screening

After stage 2 screening is complete, we will screen based on the authorship team. When the same 'core' authors (first, last, and/or corresponding) conduct two or more of the identified Discordant Reviews, we will only include one of the multiple Discordant Reviews (i.e. the most recent study will be selected). Our rationale is that author groups use the same methods to assess discordance (e.g. Mascarenas [24] and Chalmers [15]).

1  
2 202 We will include Discordant Reviews in any language and publication status, published anytime. We  
3  
4 203 will use Google translate to interpret non-English studies for screening and assessment. The resulting  
5  
6 204 publications will form the set for study 2.

7 205  
8  
9 206 In the case where the authors of this study are also authors of one or several of the included Discordant  
10  
11 207 Reviews, those authors will not conduct screening, extraction, Jadad assessment, or analysis of the  
12  
13 208 Discordant Review in question.

14 209  
15  
16 210 Full-texts of all SRs included in an Discordant Review will be obtained.

### 17 211 18 19 212 **3.4 Extraction of the primary intervention and outcome**

#### 20 21 213 **3.4.1 Identification of the primary outcome from the Discordant Review**

22 214 As a first step in assessing discordance, we will identify the primary outcome from each Discordant  
23  
24 215 Review. The primary outcome will be extracted when it is explicitly defined in the title, abstract,  
25  
26 216 objectives, introduction or methods sections [34, 35]. If the primary outcome is not found in any of  
27  
28 217 these sections, we will extract it as the first outcome mentioned in the manuscript [34, 35]. If the  
29  
30 218 primary outcome cannot be identified by any of these approaches, we will consider that the article did  
31  
32 219 not specify primary outcomes and the study will be excluded, and replaced with the next Discordant  
33  
34 220 Review in our database.

#### 35 36 222 **3.4.2 Identification of the primary intervention from the Discordant Review**

37  
38 223 Identification of the primary outcome and intervention is a two-step process. As a first step, we will identify  
39  
40 224 the primary intervention associated with the primary outcome from each Discordant Review. Then we  
41  
42 225 will extract the primary outcome and intervention from the included systematic reviews when doing the Jadad  
43  
44 226 assessments. If this is unclear, we will choose the first intervention highlighted in the title or abstract of  
45  
46 227 the Discordant Review [35].

#### 47 228 48 49 230 **3.4.3 Identification of included SRs with meta-analysis of RCTs addressing the primary intervention/outcome of the Discordant Review**

50 231 Once the primary outcome is identified, we will next identify how many SRs with meta-analysis of  
51  
52 232 RCTs were included in the Discordant Review that address the primary outcome and intervention. It is  
53  
54 233 this sample of SRs with meta-analysis of RCTs that will be the focus of our Jadad assessments.

#### 55 234 56 57 235 **3.4.4 Process to identify primary intervention and outcome**

236 Two authors will extract the primary intervention and outcome, and disagreements will be discussed  
237 until consensus is reached.

### 239 3.5 Blinding of results in the included SRs

240 Observer bias, sometimes called “detection bias” or “ascertainment bias,” occurs when outcome  
241 assessments are systematically influenced by the assessors’ conscious or unconscious predispositions  
242 [36]. Blinded outcome assessors are used in trials to avoid such bias. One empirical study found  
243 evidence of high risk of substantial bias when authors failed to blind outcome assessors in trials [36],  
244 whereas another did not [37]. In our study, it is important that reviewers are blinded to the Discordant  
245 Review authors’ result of the Jadad assessment, as unblinding might predispose them to unconsciously  
246 choose the same SR as the Discordant Review authors.

248 We will blind the following components containing study results of the Jadad assessment and  
249 conclusions: abstract, highlights, results of the Jadad assessment, and discussion/conclusions section.  
250 Blinding will be achieved via deletion using the paywalled Adobe Acrobat Pro or the freeware  
251 PDFCandy (<https://pdfcandy.com>). One author will blind the Discordant Review results and will not be  
252 involved in the Jadad assessment pertaining to those results. Assessors will be instructed not to search  
253 for and read the included Discordant Reviews prior to, and during, assessment.

### 255 3.6 Piloting Jadad assessment prior to full assessment

256 A pilot practice exercise will be conducted by all assessors prior to the Jadad assessments, to ensure  
257 consistent assessments across reviewers. Two Jadad assessments will be piloted by each reviewer and  
258 compared to a second to identify discrepancies that are to be resolved through discussion. Any  
259 necessary revisions to the assessment (sections 3.7 and 3.8) will be noted.

### 261 3.7 Jadad assessments of discordance across SRs

262 While the Jadad paper provides an algorithm intended to identify and address discordance between SRs  
263 in an Discordant Review, there is limited guidance within the manuscript regarding the  
264 application/operationalization of the algorithm. Absence of this detailed guidance leaves room for  
265 subjective (mis)interpretation and ultimately confusion when it comes time to use the algorithm. To  
266 address this, we engaged in an iterative process of interpretation and implementation of the algorithm  
267 step by step. This process involved virtual meetings whereby consensus was sought for decision rules  
268 at each step of the algorithm to ensure consistency in both interpretation and application. Feedback was

1  
2 269 solicited and decision rules were accordingly adjusted until consensus was achieved. This tool  
3  
4 270 underwent pilot testing as described in 3.6 where feedback was further solicited and adjustments were  
5  
6 271 made.

7 272  
8  
9 273 The Jadad decision tree assesses and compares sources of inconsistency between SRs with meta-  
10  
11 274 analyses, including differences in clinical, public health, or policy questions, inclusion and exclusion  
12  
13 275 criteria, extracted data, methodological quality assessments, data combining, and statistical analysis  
14  
15 276 methods.

16 277  
17 278 Step A is to examine the multiple SRs matching the Discordant Review question using a PICO  
18  
19 279 framework. If the clinical, public health, or policy questions are not identical, then step B indicates  
20  
21 280 choosing the SR closest to the decision makers' research question and no further assessment is  
22  
23 281 necessary. If multiple SRs are found with the same PICO, then step C should be investigated. As we  
24  
25 282 are using Discordant Reviews as our sample, we will start at Step C in the Jadad decision tree.  
26  
27 283

28 284 **Figure 1. Jadad (1997) decision tree.**

29 285  
30  
31 286 Here we detail our interpretation of the Jadad algorithm for each step in assessing the discordance in a  
32  
33 287 group of SRs with similar PICO elements. Two researchers will independently assess each set of SRs  
34  
35 288 in the included Discordant Review using the Jadad algorithm, starting with Step C (Figure 1).

36 289 Information and data from the Discordant Review will be used first if reported, and when data is not  
37  
38 290 reported, we will consult the full text of the included SRs. If a Discordant Review or the included SRs  
39  
40 291 does not report a method, we will indicate it as "not reported," and it will not be chosen for that step.

41 292  
42  
43 293 Step D and G follow from Step C. Steps E, F, H, and I are completed depending on the decisions at  
44  
45 294 Steps D and G, respectively.

46 295  
47  
48 296 "Meeting" a step means a SR met the criteria in the sub-step or step that is highest in the hierarchy. For  
49  
50 297 example, a SR that meets E3 criteria fulfills criteria A and B, which is the highest in our hierarchy.

51 298  
52  
53 299 **3.7.2 Step C - Do the reviews include the same trials for the primary intervention and outcome?**

54 300 We will determine if the RCTs are similar across SRs by either finding this information in the  
55  
56 301 Discordant Review, or extracting all RCTs from the included SRs using an excel matrix to list the SRs



1  
2 302 at the top, and trials in the left rows. The RCTs will be mapped to the SRs in order of publication date  
3  
4 303 (earliest trials at the top). Using this matrix, we will determine if the SRs include the same or different  
5  
6 304 trials.

### 7 305 8 9 306 **3.7.3 Step D - Are the reviews of the same quality?**

10  
11 307 If the SRs contain the same trials, then the assessor moves to Step D – assess whether the SRs are the  
12  
13 308 same methodological quality. We will either (a) extract the risk of bias/quality assessments from the  
14  
15 309 Discordant Review if the Discordant Review used AMSTAR [38], AMSTAR 2 [39], or ROBIS [40].  
16  
17 310 AMSTAR [38] and the updated AMSTAR 2 [39] are tools to assess methodological quality (i.e. quality  
18  
19 311 of conduct and reporting) and ROBIS [40] is a tool used to assess the risk of bias at the systematic-  
20  
21 312 review level. Review-level biases include selective outcome reporting (e.g. only describing the  
22  
23 313 statistically significant, and not describing all outcomes) and publication bias (e.g. published studies are  
24  
25 314 more likely to report positive results). If the Discordant Review authors used any other tool or method  
26  
27 315 to assess the risk of bias/quality of the SRs or did not assess the risk of bias/quality assessment at all,  
28  
29 316 we will conduct our own assessment using the ROBIS tool [40].

### 30 31 317 32 33 318 **3.7.4 Step E – Assess and compare data extraction, clinical heterogeneity, and data synthesis**

34  
35 319 If the SRs are the same risk of bias/quality, then the next step is Step E, to assess and compare data  
36  
37 320 extraction, clinical heterogeneity, and data synthesis across the SRs.

#### 38 39 321 40 41 322 **Step E1 - Assess and compare the data extraction methods across reviews**

42  
43 323 For this step, Jadad states, “If reviews differ [in outcomes reported], the decision-maker should  
44  
45 324 identify the review that takes into account the outcome measures most relevant to the problem that  
46  
47 325 he or she is solving.” We interpret this step as selecting the SR that (A) matches the Discordant  
48  
49 326 Review’s primary outcome.

50  
51 327  
52  
53 328 Jadad then writes that SRs that conduct independent extractions by two reviewers are of the  
54  
55 329 highest quality. We therefore decided that SRs that (B) used an independent data extraction  
56  
57 330 process using two SR authors should be chosen. If a ROBIS assessment is done, then the latter  
58  
59 331 point will be mapped to ROBIS 3.1. “Were efforts made to minimise error in data collection?”

60  
61 332  
62  
63 333 Decision rules:

64 334 #1. Reviews that meet criteria A and B are highest in our hierarchy  
65  
66  
67  
68  
69  
70

1  
2 335 #2. Reviews that meet criteria A are second highest in our hierarchy

3  
4 336 #3. Reviews that meet criteria B are third highest in our hierarchy

5  
6 337  
7 338 **Step E2 – Assess and compare clinical heterogeneity of the included RCTs across reviews**

8  
9 339 Clinical heterogeneity is assessed at the SR level by examining the clinical, public health, or policy  
10  
11 340 question pertaining to the primary outcome and the eligibility criteria PICO elements of each  
12  
13 341 included RCT to see if they are sufficiently similar. If the PICO across RCTs are similar, then  
14  
15 342 clinical heterogeneity is minimal, and SRs can progress with pooling study results in a meta-  
16  
17 343 analysis. If a ROBIS assessment is done, this question is mapped to ROBIS 4.3 “Was the synthesis  
18  
19 344 appropriate given the nature and similarity in the clinical, public health, or policy questions, study  
20  
21 345 designs, and outcomes across included SRs?”

22  
23 347 If a SR states that (A) they assessed for clinical (e.g., PICO) heterogeneity across RCTs (in the  
24  
25 348 methods or results sections), then this will be the SR that is chosen at this step. Example of a SR  
26  
27 349 reporting a clinical heterogeneity assessment: "If we found 3 or more systematic SRs with similar  
28  
29 350 study populations, treatment interventions, and outcome assessments, we conducted quantitative  
30  
31 351 analyses (Gaynes 2014)". If authors reported and described clinical heterogeneity in the  
32  
33 352 manuscript, then rule (B) authors that judged the clinical heterogeneity assessment to be minimal  
34  
35 353 or low with rationale, will be chosen at this step.

36 354  
37 355 Decision rule:

38 356 #1. Reviews that meet criteria A and B are highest in the hierarchy

39 357 #2. Reviews that meet criteria A are second highest in our hierarchy

40  
41 358  
42  
43 359 **Step E3 – Assess and compare data analysis methods across reviews**

44 360 Jadad et al. are purposefully vague when describing how to judge whether a meta-analysis was  
45  
46 361 appropriately conducted. **This step was interpreted as reviews that conducted: (A) an appropriate  
47 362 weighted technique to combine study results (i.e. fixed or random effects model) and (B) an  
48  
49 363 investigation of statistical heterogeneity (i.e. by reporting  $I^2$ ,  $\tau^2$ , or  $\chi^2$ ) (Figure 2).**

50 364  
51  
52 365 Decision rules for if the presence or absence of heterogeneity is present in the meta-analysis:

53  
54 366 #1. Reviews that meet criteria A and B are highest in our hierarchy

55 367 #2. Reviews that meet criteria A only are second highest in our hierarchy

1  
2 368 #3. Reviews that meet criteria B only are third highest in our hierarchy (this decision can be  
3  
4 369 ignored if heterogeneity is not observed)  
5  
6 370

#### 7 371 **Decision rules for Step E.**

9 372 #1. Reviews that meet Step E1, E2, and E3 are highest in our hierarchy

10  
11 373 #2. Reviews that meet Step E1 and E2 second highest in our hierarchy

12 374 #3. Reviews that meet Step E1 third highest in our hierarchy

14 375 #4. Reviews that meet Step E2 and E3 fourth highest in our hierarchy

15  
16 376 #5. Reviews that meet Step E2 fifth highest in our hierarchy

17 377 #6. Reviews that meet Step E3 sixth highest in our hierarchy

19 378 Note: Reporting only Steps E1, E2 or E3 is not considered a systematic approach to evidence  
20  
21 379 synthesis.  
22  
23 380

#### 24 381 25 26 382 **Figure 2. Our Approach to Operationalizing Step E of the Jadad Algorithm.**

#### 27 383 28 29 384 30 31 385 32 386 **3.7.5 Step F - Select the review with the lowest risk of bias, or the highest quality**

34 387 From the risk of bias/quality assessment conducted through Step D, we will choose the SR with the  
35  
36 388 lowest risk of bias judgement, or highest quality assessment rating. ROBIS contains a last phase where  
37  
38 389 reviewers are asked to summarise concerns identified in each domain and describe whether the  
39 390 conclusions were supported by the evidence. Based on these last decisions, a final SR rating will be  
40  
41 391 made based on high, low or unclear risk of bias. For our Jadad assessment, we will choose a binary  
42  
43 392 rating of either high risk or low risk of bias. Any SRs assessed as 'Unclear' risk of bias will be deemed  
44 393 as high risk. When using the assessments of risk of bias/quality of SRs from the included Discordant  
45  
46 394 Reviews, we will choose the rating of the authors. If uncertainty exists, we will re-assess the included  
47  
48 395 SRs using ROBIS.  
49 396

#### 50 51 397 **3.7.6 Step G - Do the reviews have the same eligibility criteria?**

52  
53 398 If the SRs do not include the same trials, then decision-makers are directed to turn to Step G – assess  
54 399 whether the SRs have the same eligibility criteria (**Figure 3**). The Discordant Review may contain text  
55  
56 400 in a methods section, or a characteristics of included SRs table where the PICO eligibility criteria can  
57  
58  
59  
60

1  
2 401 be extracted and assessed. If this is not the case, then the PICO eligibility criteria will be extracted from  
3  
4 402 the included SRs by two authors independently and then compared to resolve any discrepancies.  
5

6 403  
7 404  
8  
9 405 **Figure 3. Our Approach to Operationalising Step G of the Jadad Algorithm**  
10  
11 406

12 407 **2.8.7 Step H - Assess and compare the search strategies and the application of the eligibility criteria**  
13  
14 408 **across reviews**

15  
16 409 If the SRs contain the same eligibility criteria, then Step H is to assess and compare the search  
17  
18 410 strategies and the application of the eligibility criteria across SRs (**Figure 4**).  
19

20  
21 412 **Step H1 - Assess and compare the search strategies across reviews**

22 413 In this step, Jadad et al.'s recommendations are vague, although they make reference to  
23  
24 414 comprehensive search strategies as being less biased. We interpret this step as authors explicitly  
25  
26 415 describing their search strategy such that it can be replicated. To meet this interpretation, our  
27  
28 416 criteria are that SRs: (A) search 2 or more databases, (B) search the grey literature; and (C)  
29 417 include a full search algorithm (may be attached as an appendix or included in the manuscript).  
30

31 418  
32  
33 419 **Decision rules:**

- 34 420 #1. Reviews that meet criteria A, B and C are highest in our hierarchy  
35  
36 421 #2. Reviews that meet criteria A and B are second highest in our hierarchy  
37  
38 422 #3. Reviews that meet criteria A and C are third highest in our hierarchy  
39 423 #4. Reviews that meet criteria B and C are fourth highest in our hierarchy (unlikely scenario)  
40  
41 424 #5. Reviews that meet criteria A only are fifth highest in our hierarchy  
42  
43 425

44 426 **SCENARIOS for Step H1**

- 45  
46 427 • 3 SRs are identified for our Jadad assessment  
47

48 428 Criteria to choose a systematic SR at Step H1: (A) 2 or more databases – (B) searched grey literature --  
49  
50 429 (C) full search in appendix  
51

52  
53 431 **Scenario 1**

54 432 Review 1: A and B, but not C (decision rule #2)

55  
56 433 Review 2: A and B but not C (decision rule #2)  
57  
58  
59  
60

1  
2  
3 434 Review 3: A and C, but not B (decision rule #3)

4 435 Conclusion: No SR meets ALL of our criteria; which do we choose? Based on our decision rules, we  
5  
6 436 choose BOTH Review 1 and 2

7 437

8  
9 438 **Scenario 2**

10  
11 439 Review 1: A, but neither B nor C (decision rule #5)

12 440 Review 2: A and B, but not C (decision rule #2)

13  
14 441 Review 3: Neither A, B, nor C (does not report the search methods)

15  
16 442 Conclusion: No SR meets ALL of our criteria; which do we choose? Based on our decision rules, we  
17  
18 443 choose Review 2

19 444

20  
21 445

22  
23 446 **Step H2 - Assess and compare the application of the eligibility criteria across reviews**

24 447 In this sub-step, Jadad indicates that we should choose the SR with the most explicit and  
25  
26 448 reproducible inclusion criteria, which is ambiguous. Jadad states, “SRs with the same selection  
27  
28 449 criteria may include different trials because of differences in the application of the criteria, which  
29  
30 450 are due to random or systematic error. Decision-makers should regard as more rigorous those SRs  
31 451 with explicit, reproducible inclusion criteria. Such criteria are likely to reduce bias in the  
32  
33 452 selection of studies” [22]. We did not know if this meant clearly reproducible PICO eligibility  
34  
35 453 criteria, as this would be a repeat to Step G, whether the eligibility criteria were applied  
36 454 consistently by SRs (i.e. compare eligibility criteria to included RCTs’ PICO to see if they indeed  
37  
38 455 met the eligibility criteria), or if this meant (A) independently screening of title, abstracts, and  
39  
40 456 full text against the eligibility criteria by two reviewers. We selected the latter criteria when  
41 457 choosing from the included SRs in an Discordant Review.

42  
43 458  
44  
45 459 Decision rules:

46 460 #1. Reviews that meet criteria A is highest in our hierarchy

47  
48 461  
49  
50 462 **Decision rules for Step H:**

51 463 #1. Reviews that meet Step H1 and H2 highest in our hierarchy

52  
53 464 #2. Reviews that meet Step H1 second highest in our hierarchy

54  
55 465 #3. Reviews that meet Step H2 third highest in our hierarchy

56 466

57

58

59

60

1  
2 467  
3  
4 468 **Figure 4. Our Approach to Operationalising Step H of the Jadad Algorithm.**

5  
6 469  
7 470 **3.7.8 Step I – Assess and compare the publication status, quality, language restrictions of the included**  
8  
9 471 **RCTs, and analysis of data on individual patients**

10  
11 472 If the SRs do not have the same eligibility criteria, then the next step, Step I, is to assess and compare  
12 473 the publication status, quality, language restrictions of the included RCTs, and analysis of data on  
13  
14 474 individual patients across the SRs (**Figure 5**). This step maps to ROBIS item 1.5, namely, “Were any  
15  
16 475 restrictions in eligibility criteria based on appropriate information sources (e.g. publication status or  
17  
18 476 format, language, availability of data) [40]?”

19 477  
20  
21 478 **Step I1 – Assess and compare the publication status of the included RCTs across reviews**

22 479 In the absence of clear guidance, we interpret this step as “choose the SR that searches for and  
23  
24 480 includes both published and unpublished data (grey literature).” Published studies are defined as  
25  
26 481 any study or data published in a peer-reviewed medical journal. Unpublished data is defined as  
27  
28 482 any information that is difficult to locate and obtained from non-peer-reviewed sources such as  
29 483 websites (e.g. World Health Organisation website, CADTH), clinical trial registries (e.g.  
30  
31 484 clinicaltrials.gov), thesis and dissertation databases, and other unpublished data registries (e.g.  
32  
33 485 LILIACS). Our interpretation is that SRs are chosen at this step that search for: (A) studies  
34 486 published in peer-reviewed medical journals, and (B) reports/documents/content that are not  
35  
36 487 published in medical journals.

37  
38 488  
39 489 Decision rules:

- 40  
41 490 #1. Reviews that meet criteria A and B are highest in our hierarchy  
42  
43 491 #2. Reviews that meet criteria A are second highest in our hierarchy  
44 492 #3. Reviews that meet criteria B are third highest in our hierarchy

45  
46 493 Note: Reporting only A or B is not considered a systematic search.  
47  
48 494

49 495 **Step I2 – Assess and compare the methods used to assess the quality of the included RCTs across**  
50  
51 496 **reviews**

52  
53 497 In this step, the Jadad paper recommends assessing the appropriateness of the *methods used to*  
54 498 assess the quality of the included RCTs across SRs. This item maps to ROBIS item 3.4, “Was the  
55  
56 499 risk of bias/quality of RCTs formally assessed using appropriate criteria?” Here we interpret this  
57  
58  
59  
60

1  
2 500 item as to whether the SR authors used the Cochrane risk of bias tool (version 1 or 2). All other  
3  
4 501 RCT quality assessment tools are inappropriate because they are out of date and omit important  
5  
6 502 biases (e.g. Agency for Healthcare Research and Quality (AHRQ) 2012 [41] omits allocation  
7  
8 503 concealment). However, the Cochrane risk of bias tool was only published in October 2008.  
9 504 Therefore, we applied a decision rule: for SRs dated 2012 (giving one year for awareness of the  
10  
11 505 tool to reach researchers) and later, the Cochrane risk of bias tool is considered the gold standard.  
12 506 For SRs dated 2009 or earlier, we considered the Jadad [42] and Schulz [43] scales to be the most  
13  
14 507 common scales used between 1995 and 2011. Other tools will be considered on a case-by-case  
15  
16 508 basis.

17 509  
18  
19 510 As a decision hierarchy, to meet the minimum criteria for this step, a SR will have (A) assessed  
20  
21 511 the risk of bias of RCTs using any tool or approaches, and (B) used the Cochrane risk of bias tool  
22  
23 512 version 1 or 2 (if dated 2009 or later). If several SRs are included that meet these two criteria, the  
24 513 SR that (C) integrates the risk of bias assessments into the results or discussion section (i.e.  
25  
26 514 discusses the risk of bias in terms of high and low risk of bias studies, reports a subgroup or  
27  
28 515 sensitivity analysis) will be chosen.

29 516  
30  
31 517 Decision rules:

- 32  
33 518 #1. Reviews that meet criteria A, B and C are highest in our hierarchy  
34 519 #2. Reviews that meet criteria B and C are second highest in our hierarchy  
35  
36 520 #3. Reviews that meet criteria A and B are third highest in our hierarchy  
37  
38 521 #4. Reviews that meet criteria A and C are fourth highest in our hierarchy (unlikely scenario)  
39 522 #5. Reviews that meet criteria A only are fifth highest in our hierarchy  
40  
41 523

### 42 43 524 **SCENARIOS for Step I2**

- 44 525 • 3 SRs are identified for our Jadad assessment  
45  
46 526

#### 47 48 527 **Scenario 1**

49 528 Review 1: A and B but not C (decision rule #3)

50  
51 529 Review 2: A and B but not C ( decision rule #3)

52  
53 530 Review 3: A and C, but not B (decision rule #4)

54 531 Conclusion: No SR meets ALL of our criteria; which do we choose? Based on our decision rules, we  
55  
56 532 choose **BOTH** Review 1 and 2  
57  
58  
59  
60

1

2 533

3 534 **Scenario 2**

5 535 Review 1: A, but neither B nor C (decision rule #5)

7 536 Review 2: A and B, but not C (decision rule #3)

9 537 Review 3: Neither A, B, nor C (does not report the search methods)

11 538 Conclusion: No SR meets ALL of our criteria; which do we choose? Based on our decision rules, we  
12 539 choose Review 2

14 540

16 541

18 542 **Step 13 - Assess and compare any language restrictions across reviews**

19 543 In this step, Jadad indicates that SRs with (A) no language restrictions in eligibility criteria  
20 544 should be prioritised and chosen over those that only include English language RCTs. This step  
21 545 maps to ROBIS item 1.5, namely, “Were any restrictions in eligibility criteria based on sources of  
22 546 info appropriate (e.g. publication status or format, language, availability of data)?”

26 547

27 548 Decision rule:

29 549 #1. Reviews that meet criteria A are highest in our hierarchy

31 550

33 551 **Step I4 – Choose the analysis of data on individual patients**

34 552 If (A) an individual patient data meta-analysis was identified in the Discordant Review, Jadad et  
35 553 al. recommend this SR be chosen over SRs with pairwise meta-analysis.

37 554

39 555 Decision rule:

41 556 #1. Reviews that meet criteria A are highest in our hierarchy

42 557

44 558 **Decision rules for Step I:**

46 559 #1. If there is an IDP meta-analysis (Step I4), then this SR is the highest in our hierarchy

48 560 #2. Reviews that meet Step I1, I2, and I3 are second highest in our hierarchy

49 561 #3. Reviews that meet Step I1 and I2 third highest in our hierarchy

51 562 #4. Reviews that meet Step I2 and I3 fourth highest in our hierarchy

53 563 #5. Reviews that meet Step I1 and I3 fifth highest in our hierarchy

54 564 #6. Reviews that meet Step I1 is sixth highest in our hierarchy

56 565 #7. Reviews that meet Step I2 is seventh highest in our hierarchy

58

59

60



#8. Reviews that meet Step I3 is eighth highest in our hierarchy

Note: Reporting only Steps I1, I2 or I3 is not considered a systematic approach to evidence synthesis.

## Figure 5. Our Approach to Operationalising Step I of the Jadad Algorithm

### 3.8 Study outcomes

#### 3.8.1 Evaluation of whether the Discordant Review authors:

- Used the Jadad decision tree to assess discordance
- Examine and record reasons for discordance (i.e. authors did not use Jadad)
- Use other approaches to deal with discordance (specify)
- Present discordance in tables and figures.

#### 3.8.2 Results from our discordance assessment and Discordant Review authors' assessments:

- Utility: Is the Jadad decision tree easy to use? (see section 2.9.3)
- Efficiency: How much time does it take to do one Jadad assessment?
- Comprehensiveness: is the Jadad algorithm comprehensive? Is it missing methods that might explain discordance (e.g. publication recency)?
- Jadad cohort: Frequency of disagreement or agreement across Jadad assessments between (a) Discordant Review authors' assessment, and (b) our assessment (i.e. choosing the same SR).
- Non-Jadad cohort: Frequency of disagreement or agreement assessments between (a) Discordant Review authors' assessment, and (b) our assessment (i.e. choosing the same SR).
- Comparison of Discordant Review authors stated sources of discordance and our identified sources of discordance.

#### 3.8.3 "Ease of use" outcome measure

Each Jadad assessment will be assessed for "ease of use" by each assessor. Each Jadad assessment will be rated and colored (green, yellow, red) based on how easy or difficult the assessment was judged to be for the user. The rating is based on the following rubric:

- 1  
2 598 • The step can be accomplished easily by the reviewer, due to low cognitive load or because it's a  
3 recognised method or approach.  
4 599  
5  
6 600 • The step requires a notable degree of cognitive load by the reviewer but can generally be  
7 601 accomplished with some effort.  
8  
9 602 • The step is difficult for the reviewer, due to significant cognitive load or confusion; some  
10 reviewers would likely fail or abandon the task at this point.  
11 603

12 604

14 605 The lower the score, the easier the step is to complete.

15  
16 606

### 17 607 **3.9 Data extraction**

#### 19 608 **3.9.1 Discordant review level extraction**

20  
21 609 The outcomes from section 3.8 will be extracted, along with the following information from the  
22 610 Discordant Review:

- 24 611 1. Study characteristics (lead author's name, publication year).  
25  
26 612 3. Clinical, public health, or policy question (objectives, health condition of treatment, PICO  
27 613 eligibility criteria: participant, intervention/comparison, and primary outcome).  
28  
29 614 4. Methods (how the Discordant Review authors assessed discordance among the SRs [Jadad or other  
30 approach], how they operationalised Jadad, steps where they identified discordance, number of  
31 615 included SRs, type of SR (e.g. individual patient data meta-analysis, SR with narrative summary,  
32 616 SR with meta-analysis of RCTs), type of analysis (narrative summary or meta-analysis), risk of  
33 617 bias/quality assessment (e.g. AMSTAR, AMSTAR 2, or ROBIS tool), risk of bias judgments, and  
34 618 whether risk of bias/quality assessment was integrated into the synthesis.  
35  
36 618 5. Results (results of discordance assessment, effect size and confidence intervals (CIs), number of  
37 619 total participants in treatment and control groups, number of total events in treatment and control  
38 620 groups), direction of study results (favourable or not favourable).  
39 621  
40 621 6. Conclusions (difference between results and conclusions defined as if they disagreed in direction  
41 622 (results, not favourable; conclusions, favourable), authors' result interpretation (quote from  
42 623 abstract and discussion section about the primary outcome result and conclusion).  
43 624  
44 625  
45 626  
46 627  
47 628  
48 629  
49 630  
50  
51 630

#### 52 628 **3.9.3 SR level extraction**

54 629 The outcomes from section 3.8 will be extracted, along with the following information from the  
55 630 included SRs:  
56 630

57  
58  
59  
60

1

- 2 631 1. Study characteristics (lead author's name, publication year).  
3  
4 632 2. Clinical, public health, or policy question (objectives, health condition of treatment, PICO  
5  
6 633 eligibility criteria: participant, intervention/comparison, and primary outcome; language  
7  
8 634 restrictions and restrictions on publication status in eligibility criteria; citation of previous  
9 635 SRs/meta-analyses in background or discussion).  
10  
11 636 3. Search methodology (the name and number of databases searched, grey literature search details,  
12  
13 637 the search period, language restrictions, restrictions on publication status, included full search in an  
14 638 appendix).  
15  
16 639 4. Methods (number and first author/year of included RCTs, effect metric (OR, RR, MD) and CIs,  
17  
18 640 whether SR authors assessed the clinical (PICO) heterogeneity across RCTs (in the methods or  
19 641 results sections), analysis method (appropriate weighted technique to combine study results [i.e.  
20  
21 642 used a fixed or random random-effects model], investigation of statistical heterogeneity [i.e. by  
22  
23 643 reporting I<sup>2</sup>, tau<sup>2</sup> or chi<sup>2</sup>], and if heterogeneity is present, then the authors investigated the causes  
24 644 of any heterogeneity [i.e. by reporting subgroup, sensitivity, or meta-regression analyses]), risk of  
25  
26 645 bias/quality assessment (e.g. Cochrane risk of bias tool v1 or v2), risk of bias/quality judgment for  
27  
28 646 each RCT, and whether the RCT quality/risk of bias assessment was integrated into the synthesis;  
29 647 2 reviewers independently screened studies, extracted data and assessed risk of bias with process  
30  
31 648 for resolving discrepancies found when comparing.  
32  
33 649 5. Results (effect size and CI, number of total participants in treatment and control groups, number of  
34 650 total events in treatment and control groups), direction of study results (favourable or not  
35  
36 651 favourable).  
37  
38 652 6. Conclusions (difference between results and conclusions defined as if they disagreed in direction  
39 653 (results, not favourable; conclusions, favourable), authors' result interpretation (quote from  
40  
41 654 abstract and discussion section about the primary outcome result and conclusion).  
42  
43 655

44 656 Two authors will extract studies independently at full-text, and in the case of discrepant decisions, will  
45  
46 657 discuss until consensus is reached.  
47  
48 658

### 49 659 3.10 Data analysis

50  
51 660 We will assess and compare our outcomes (a) narratively for qualitative data, (b) using frequencies and  
52  
53 661 percentages for categorical data, and (c) using median and interquartile range (IQR) for continuous  
54 662 data. Our analysis will be organised by our study outcomes in tables and in figures. We will discuss  
55  
56  
57  
58  
59  
60

1  
2 663 differences in the assessment of discordance across Discordant Reviews using Jadad and Discordant  
3  
4 664 Reviews not using Jadad.

5  
6 665

#### 7 666 **4.0 PATIENT AND PUBLIC INVOLVEMENT**

8  
9 667 Patients nor the public were not involved in the design of our research protocol.

10  
11 668

### 12 669 **5.0 ETHICS, DISSEMINATION, STRENGTHS AND LIMITATIONS**

#### 13 670 **5.1 Ethics**

14  
15  
16 671 No ethics approval was required as no human subjects were involved.

17  
18 672

#### 19 673 **5.2 Dissemination**

20  
21 674 We will disseminate evidence summaries through academic and social media platforms and websites  
22  
23 675 (e.g. Twitter, Researchgate). We will publish in an open-access journal, and present at various formal  
24 676 and informal venues such as the Therapeutics Initiative Methods Speaker Series, and academic  
25  
26 677 conferences such as Guidelines International Network conference, Cochrane Colloquium, and Public  
27  
28 678 Health.

29 679  
30

#### 31 680 **5.3 Strengths and limitations**

32  
33 681 We aim to use a systematic approach to evaluate authors' assessment of discordance across SRs in  
34 682 Discordant Reviews and replicate Jadad algorithm assessments from a sample of Discordant Reviews.  
35  
36 683 We suspect that one reason for the inconsistent use of the Jadad algorithm in the existing literature may  
37  
38 684 be due to the limited guidance available in the original Jadad manuscript on implementing the  
39 685 algorithm. We believe the greatest strength of the proposed study will be that we used an iterative  
40  
41 686 process among authors to develop decision rules for the interpretation and application of each step in  
42  
43 687 the Jadad algorithm. Upon completion and dissemination of this study, other Discordant Review  
44 688 authors will have more detailed guidance on how to apply the Jadad algorithm when addressing  
45  
46 689 discordance in Discordant Reviews. Furthermore, our study adopted a systematic and transparent  
47  
48 690 approach to address the objectives outlined in our protocol using SR guidance [26]. A comprehensive  
49 691 search strategy, including a search of the grey literature, was employed with no restrictions on  
50  
51 692 language and publication status to yield relevant studies and minimise publication bias. To minimise  
52  
53 693 error, screening, extractions, and assessments will be completed by two independent reviewers, and  
54 694 subsequently compared. Any discrepancies will be resolved upon consensus, and if necessary, with the

55  
56  
57  
58  
59  
60

1  
2 695 involvement of a third reviewer. To mitigate observer bias, reviewers were blinded to the Discordant  
3  
4 696 Reviews' Jadad assessments.

5  
6 697 Despite several strengths, this study also has limitations that are to be noted. In our search  
7  
8 698 update, we only searched MEDLINE (Ovid) which would have limited the number of potentially  
9  
10 699 relevant studies found. However, since the aim of our methods study is to replicate Jadad algorithm  
11  
12 700 assessments, we do not think updating our search would make a difference to the robustness of the  
13  
14 701 results. Our search strategy may have been more complete by adding terms such as inconsistencies or  
15  
16 702 concerns, and truncated variations. Moreover, the searches were not carried out with the guidance from  
17  
18 703 a trained medical/health librarian and/or peer reviewed. We did not, however, aim to retrieve all  
19  
20 704 Discordant Reviews in the literature, as we could only feasibly replicate 30 such studies.

21  
22 705 In addition, by only focusing on Discordant Reviews specific to health interventions, we may  
23  
24 706 potentially have overlooked a number of relevant Discordant Reviews that may have assessed  
25  
26 707 discordance and/or employed the Jadad algorithm. When utilising the tools for assessment (i.e. risk of  
27  
28 708 bias tools or Jadad decision tree), there will be subjectivity in the judgements potentially introducing  
29  
30 709 variability in the results. To overcome this limitation, pilot screening and pilot assessments will be  
31  
32 710 completed by reviewers and assessed to ensure consistency in understanding of the screening criteria,  
33  
34 711 definitions of extracted items, and steps in the Jadad assessment.

35  
36 712 Some steps in the Jadad algorithm were vague in description (e.g. step I2), making it difficult to  
37  
38 713 interpret. For example, step I2 assesses the methods used to assess the quality of included RCTs across  
39  
40 714 SRs. Some authors could interpret this as assessing if SR authors used the Cochrane risk of bias to  
41  
42 715 assess the quality of RCTs across SRs. However, the Cochrane risk of bias tool was only published in  
43  
44 716 2008. To minimise the incorrect interpretation of this step, we solicited feedback at the protocol stage  
45  
46 717 from all authors in its interpretation prior to piloting. Thus, after discussion with authors, we applied a  
47  
48 718 decision rule that for SRs dates 2009 and earlier, we considered the Jadad [42] and Schulz [43] scales  
49  
50 719 to be the most common scale between 1995 and 2009, in addition to other tools being considered on a  
51  
52 720 case-by-case basis. This was done for all steps. Additionally, during piloting we will amend our  
53  
54 721 interpretation and instructions on how to operationalise the Jadad algorithm to ensure consistent  
55  
56 722 application.

1  
2 **725 Figure legend**

3  
4 **726** Figure 1. Jadad (1997) decision tree.

5  
6 **727**  
7 **728** Figure 2. Our Approach to Operationalizing Step E of the Jadad Algorithm

8  
9 **729**  
10  
11 **730** Figure 3. Our Approach to Operationalising Step G of the Jadad Algorithm

12 **731**  
13  
14 **732** Figure 4. Our Approach to Operationalising Step H of the Jadad Algorithm

15  
16 **733**  
17 **734** Figure 5. Our Approach to Operationalising Step I of the Jadad Algorithm

18  
19 **735**  
20  
21 **736 Declarations**

22 **737** No declarations.

23  
24 **738**  
25  
26 **739 Consent for publication**

27 **740** Not applicable

28  
29 **741**  
30  
31 **742 Availability of data and materials**

32 **743** Not applicable

33  
34 **744**  
35  
36 **745 Competing interests**

37 **746** The authors declare that they have no competing interests.

38  
39 **747**  
40  
41 **748 Funding**

42 **749** No grants or funding were successful for this important study. Dr. Andrea Tricco currently holds a Tier  
43  
44 **750** 2 Canada Research Chair in Knowledge Synthesis and an Ontario Ministry of Research and Innovation  
45  
46 **751** Early Researcher Award. Dr. Carole Lunny is funded by a CIHR project grant for her postdoctoral  
47  
48 **752** research.

49 **753**  
50  
51 **754 Authors' contributions**

52 **755** CL conceived of the study; CL, NF, ACT, SW, KK, AS, PS, DW, LP, WZ, RA, JT, YC, BK, JZ, ER,  
53  
54 **756** HN, ST, DP, PT, SK, SST contributed to the design of the study; CL drafted the manuscript; CL, NF,

55  
56  
57  
58  
59  
60

1  
2 757 ACT, SW, KK, AS, PS, DW, LP, WZ, RA, JT, YC, BK, JZ, ER, HN, ST, DP, PT, SK, SST edited the  
3  
4 758 manuscript and read and approved the final manuscript.  
5

6 759  
7  
8  
9  
10  
11  
12  
13  
14  
15  
16  
17  
18  
19  
20  
21  
22  
23  
24  
25  
26  
27  
28  
29  
30  
31  
32  
33  
34  
35  
36  
37  
38  
39  
40  
41  
42  
43  
44  
45  
46  
47  
48  
49  
50  
51  
52  
53  
54  
55  
56  
57  
58  
59  
60

For peer review only

1

## 2 760 References

3 761

4 762

5 763

6 764

7 765

8 766

9 767

10 768

11 769

12 770

13 771

14 772

15 773

16 774

17 775

18 776

19 777

20 778

21 779

22 780

23 781

24 782

25 783

26 784

27 785

28 786

29 787

30 788

31 789

32 790

33 791

34 792

35 793

36 794

37 795

38 796

39 797

40 798

41 799

42 800

43 801

44 802

45 803

46 804

47 805

48 806

49 807

50 808

51 809

52

53

54

55

56

57

58

59

60

1. Bastian H, Glasziou P, Chalmers IJ: **Seventy-five trials and eleven systematic reviews a day: how will we ever keep up?** 2010, *7*(9):e1000326.
2. Taito S, Kataoka Y, Ariie T, Oide S, Tsujimoto Y: **Assessment of the Publication Trends of COVID-19 Systematic Reviews and Randomized Controlled Trials.** *Annals of Clinical Epidemiology* 2021, *3*(2):56-58.
3. Niforatos JD, Weaver M, Johansen ME: **Assessment of Publication Trends of Systematic Reviews and Randomized Clinical Trials, 1995 to 2017.** *JAMA Internal Medicine* 2019, *179*(11):1593-1594.
4. Becker LA, Oxman, A.D.: **Chapter 22: Overviews of reviews.** In: *Cochrane Handbook for Systematic Reviews of Interventions.* edn. Edited by Higgins JPT GSE. Hoboken, NJ: John Wiley & Sons; 2008: 607-631.
5. Pieper D, Antoine SL, Mathes T, Neugebauer EA, Eikermann M: **Systematic review finds overlapping reviews were not mentioned in every other overview.** *J Clin Epidemiol* 2014, *67*(4):368-375.
6. Pieper D, Mathes T, Eikermann M: **Impact of choice of quality appraisal tool for systematic reviews in overviews.** *J Evid Based Med* 2014, *7*(2):72-78.
7. Smith V, Devane D, Begley CM, Clarke M: **Methodology in conducting a systematic review of systematic reviews of healthcare interventions.** *BMC Med Res Methodol* 2011, *11*(1):15.
8. Caird J, Sutcliffe K, Kwan I, Dickson K, Thomas J: **Mediating policy-relevant evidence at speed: are systematic reviews of systematic reviews a useful approach?** *Evidence & Policy: A Journal of Research, Debate and Practice* 2015, *11*(1):81-97.
9. Hunt H, Pollock A, Campbell P, Estcourt L, Brunton GJSr: **An introduction to overviews of reviews: planning a relevant research question and objective for an overview.** 2018, *7*(1):39.
10. Ioannidis JPA: **The Mass Production of Redundant, Misleading, and Conflicted Systematic Reviews and Meta-analyses.** *The Milbank quarterly* 2016, *94*(3):485-514.
11. Lunny C, Brennan SE, McDonald S, McKenzie JE: **Toward a comprehensive evidence map of overview of systematic review methods: paper 1-purpose, eligibility, search and data extraction.** *Syst Rev* 2017, *6*(1):231.
12. Lunny C, Brennan SE, McDonald S, McKenzie JE: **Toward a comprehensive evidence map of overview of systematic review methods: paper 2-risk of bias assessment; synthesis, presentation and summary of the findings; and assessment of the certainty of the evidence.** *Syst Rev* 2018, *7*(1):159.
13. Bolland MJ, Grey A: **A case study of discordant overlapping meta-analyses: vitamin d supplements and fracture.** *PloS one* 2014, *9*(12):e115934.
14. Campbell J, Bellamy N, Gee T: **Differences between systematic reviews/meta-analyses of hyaluronic acid/hyaluronan/hylan in osteoarthritis of the knee.** *Osteoarthritis and cartilage / OARS, Osteoarthritis Research Society* 2007, *15*(12):1424-1436.
15. Chalmers PN, Mascarenhas R, Leroux T, Sayegh ET, Verma NN, Cole BJ, Romeo AA: **Do arthroscopic and open stabilization techniques restore equivalent stability to the shoulder in the setting of anterior glenohumeral instability? a systematic review of overlapping meta-analyses.** *Arthroscopy : the journal of arthroscopic & related surgery : official publication of the Arthroscopy Association of North America and the International Arthroscopy Association* 2015, *31*(2):355-363.
16. Riva N, Puljak L, Moja L, Ageno W, Schünemann H, Magrini N, Squizzato A: **Multiple overlapping systematic reviews facilitate the origin of disputes: the case of thrombolytic therapy for pulmonary embolism.** *J Clin Epidemiol* 2018, *97*:1-13.



- 1  
2 810 17. Vavken P, Dorotka R: **A systematic review of conflicting meta-analyses in orthopaedic surgery**. *Clinical Orthopaedics and Related Research*® 2009, **467**(10):2723-2735.
- 3 811  
4 812 18. Peters WD, Panchbhavi VK: **Primary Arthrodesis Versus Open Reduction and Internal Fixation Outcomes for Lisfranc Injuries: An Analysis of Conflicting Meta-analysis Results**. *Foot & Ankle Orthopaedics* 2020, **5**(4):2473011420S2473000383.
- 5 813  
6 814  
7 815 19. Susantitaphong P, Jaber BL: **Understanding discordant meta-analyses of convective dialytic therapies for chronic kidney failure**. *American Journal of Kidney Diseases* 2014, **63**(6):888-891.
- 8 816  
9 817  
10 818 20. Teehan GS, Liangos O, Lau J, Levey AS, Pereira BJ, Jaber BL: **Dialysis membrane and modality in Acute Renal Failure: Understanding discordant meta-analyses**. In: *Seminars in dialysis: 2003*: Wiley Online Library; 2003: 356-360.
- 11 819  
12 820  
13 821 21. Druyts E, Thorlund K, Humphreys S, Lion M, Cooper CL, Mills EJ: **Interpreting discordant indirect and multiple treatment comparison meta-analyses: an evaluation of direct acting antivirals for chronic hepatitis C infection**. *Clinical epidemiology* 2013, **5**:173-183.
- 14 822  
15 823  
16 824 22. Jadad AR, Cook DJ, Browman GP: **A guide to interpreting discordant systematic reviews**. *CMAJ : Canadian Medical Association journal = journal de l'Association medicale canadienne* 1997, **156**(10):1411-1416.
- 17 825  
18 826  
19 827 23. Li Q, Wang C, Huo Y, Jia Z, Wang X: **Minimally invasive versus open surgery for acute Achilles tendon rupture: a systematic review of overlapping meta-analyses**. *Journal of orthopaedic surgery and research* 2016, **11**(1):65.
- 20 828  
21 829  
22 830 24. Mascarenhas R, Chalmers PN, Sayegh ET, Bhandari M, Verma NN, Cole BJ, Romeo AA: **Is double-row rotator cuff repair clinically superior to single-row rotator cuff repair: a systematic review of overlapping meta-analyses**. *Arthroscopy : the journal of arthroscopic & related surgery : official publication of the Arthroscopy Association of North America and the International Arthroscopy Association* 2014, **30**(9):1156-1165.
- 23 831  
24 832  
25 833  
26 834 25. Zhao JG, Wang J, Long L: **Surgical Versus Conservative Treatments for Displaced Midshaft Clavicular Fractures: A Systematic Review of Overlapping Meta-Analyses**. *Medicine* 2015, **94**(26):e1057.
- 27 835  
28 836  
29 837 26. Higgins JP: **Cochrane handbook for systematic reviews of interventions version 5.0. 1. The Cochrane Collaboration**. <http://www.cochrane-handbook.org> 2008.
- 30 838  
31 839  
32 840 27. Lunny C, Neelakant T, Chen A, Shinger G, Stevens A, Tasnim S, Sadeghipouya S, Adams S, Zheng YW, Lin L *et al*: **Bibliometric study of 'overviews of systematic reviews' of health interventions: Evaluation of prevalence, citation and journal impact factor**. *Res Synth Methods* 2021.
- 33 841  
34 842  
35 843  
36 844 28. Lunny C, McKenzie JE, McDonald S: **Retrieval of overviews of systematic reviews in MEDLINE was improved by the development of an objectively derived and validated search strategy**. *Journal of clinical epidemiology* 2016, **74**:107-118.
- 37 845  
38 846  
39 847 29. Goossen K, Hess S, Lunny C, Pieper D: **Database combinations to retrieve systematic reviews in overviews of reviews: a methodological study**. *BMC medical research methodology* 2020, **20**(1):138-138.
- 40 848  
41 849  
42 850 30. Fabiano GA, Schatz NK, Aloe AM, Chacko A, Chronis-Tuscano A: **A systematic review of meta-analyses of psychosocial treatment for attention-deficit/hyperactivity disorder**. *Clin Child Fam Psychol Rev* 2015, **18**(1):77-97.
- 43 851  
44 852  
45 853 31. Finnane A, Janda M, Hayes SC: **Review of the evidence of lymphedema treatment effect**. *American journal of physical medicine & rehabilitation* 2015, **94**(6):483-498.
- 46 854  
47 855  
48 856 32. Lau R, Stevenson F, Ong BN, Dziedzic K, Treweek S, Eldridge S, Everitt H, Kennedy A, Qureshi N, Rogers A: **Achieving change in primary care—effectiveness of strategies for improving implementation of complex interventions: systematic review of reviews**. *BMJ open* 2015, **5**(12):e009993.
- 49 857  
50 858  
51 859 33. López NJ, Uribe S, Martinez B: **Effect of periodontal treatment on preterm birth rate: a systematic review of meta-analyses**. *Periodontology 2000* 2015, **67**(1):87-130.
- 52 860  
53 861  
54 862 34. Moher D, Dulberg CS, Wells GA: **Statistical power, sample size, and their reporting in randomized controlled trials**. *Jama* 1994, **272**(2):122-124.
- 55  
56  
57  
58  
59  
60

- 1  
2 863 35. Tricco AC, Tetzlaff J, Pham B, Brehaut J, Moher D: **Non-Cochrane vs. Cochrane reviews**  
3 864 **were twice as likely to have positive conclusion statements: cross-sectional study.** *J*  
4 865 *Clin Epidemiol* 2009, **62**(4):380-386.e381.
- 5 866 36. Hróbjartsson A, Thomsen ASS, Emanuelsson F, Tendal B, Hilden J, Boutron I, Ravaud P,  
6 867 Brorson S: **Observer bias in randomized clinical trials with measurement scale**  
7 868 **outcomes: a systematic review of trials with both blinded and nonblinded assessors.**  
8 869 *CMAJ : Canadian Medical Association journal = journal de l'Association medicale canadienne*  
9 870 2013, **185**(4):E201-E211.
- 10 871 37. Morissette K, Tricco AC, Horsley T, Chen MH, Moher D: **Blinded versus unblinded**  
11 872 **assessments of risk of bias in studies included in a systematic review.** *Cochrane*  
12 873 *Database of Systematic Reviews* 2011(9).
- 13 874 38. Shea BJ, Grimshaw JM, Wells GA, Boers M, Andersson N, Hamel C, Porter AC, Tugwell P,  
14 875 Moher D, Bouter LM: **Development of AMSTAR: a measurement tool to assess the**  
15 876 **methodological quality of systematic reviews.** *BMC Med Res Methodol* 2007, **7**(1):1-7.
- 16 877 39. Shea BJ, Reeves BC, Wells G, Thuku M, Hamel C, Moran J, Moher D, Tugwell P, Welch V,  
17 878 Kristjansson E: **AMSTAR 2: a critical appraisal tool for systematic reviews that include**  
18 879 **randomised or non-randomised studies of healthcare interventions, or both.** *bmj* 2017,  
19 880 **358**.
- 20 881 40. Whiting P SJ, Churchill R.: **Introduction to ROBIS, a new tool to assess the risk of bias in**  
21 882 **a systematic review.** In: *23rd Cochrane Colloquium: 2015; Vienna, Austria*: John Wiley &  
22 883 Sons; 2015.
- 23 884 41. Viswanathan M, Patnode CD, Berkman ND, Bass EB, Chang S, Hartling L, Murad MH,  
24 885 Treadwell JR, Kane RL: **Assessing the risk of bias in systematic reviews of health care**  
25 886 **interventions.** *Methods guide for effectiveness and comparative effectiveness reviews*  
26 887 *[Internet]* 2017.
- 27 888 42. Jadad AR, Moher D, Klassen TP: **Guides for reading and interpreting systematic reviews:**  
28 889 **II. How did the authors find the studies and assess their quality?** *Archives of pediatrics &*  
29 890 *adolescent medicine* 1998, **152**(8):812-817.
- 30 891 43. Schulz KF, Chalmers I, Hayes RJ, Altman DG: **Empirical evidence of bias: dimensions of**  
31 892 **methodological quality associated with estimates of treatment effects in controlled**  
32 893 **trials.** *Jama* 1995, **273**(5):408-412.
- 33 894  
34  
35  
36  
37  
38  
39  
40  
41  
42  
43  
44  
45  
46  
47  
48  
49  
50  
51  
52  
53  
54  
55  
56  
57  
58  
59  
60

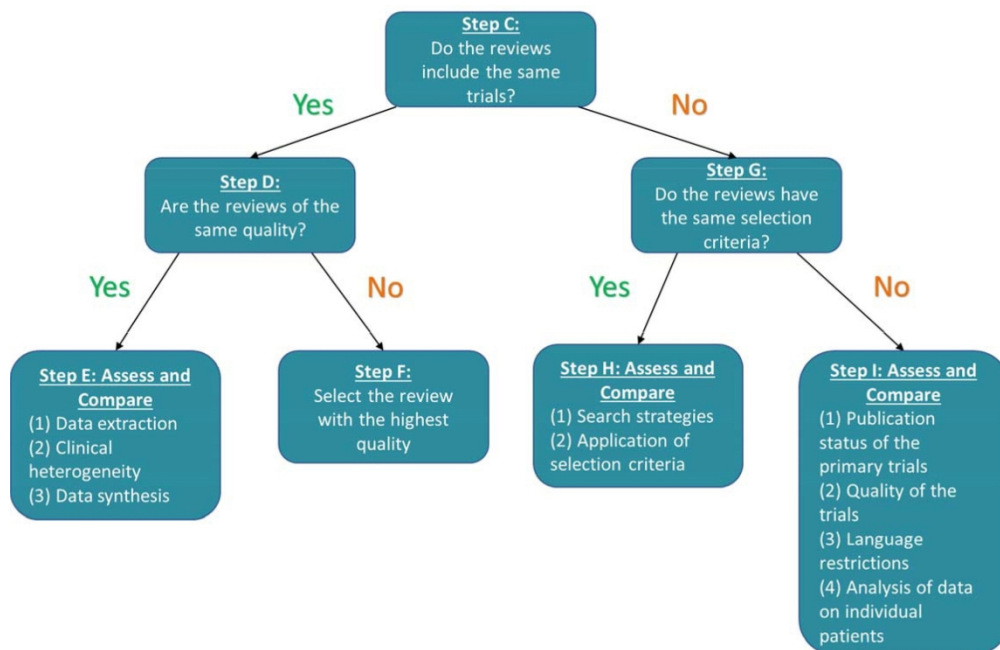

Figure 1. Jadad (1997) decision tree.

Figure 1

190x130mm (300 x 300 DPI)

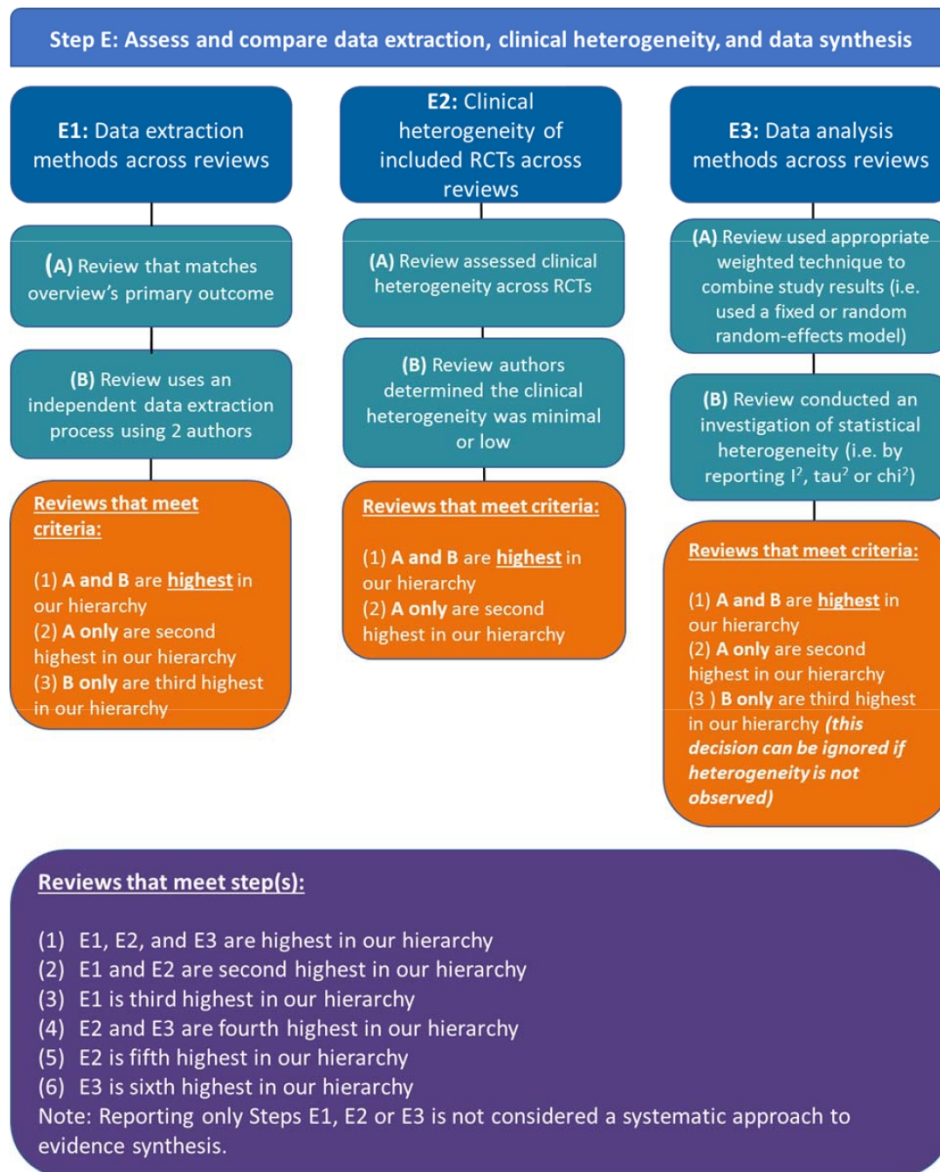

**Figure 2. Our Approach to Operationalizing Step E of the Jadad Algorithm.**

Figure 2

164x208mm (300 x 300 DPI)

1  
2  
3  
4  
5  
6  
7 **Step G: Do the reviews have the same eligibility criteria?**  
8

9  
10 PICO eligibility criteria can be extracted and assessed:  
11

12 P: Population

13 I: Intervention

14 C: Comparator

15 O: Outcome  
16

17 **Figure 3. Our Approach to Operationalising Step G of the Jadad Algorithm**  
18

19 Figure 3

20  
21 160x61mm (300 x 300 DPI)  
22  
23  
24  
25  
26  
27  
28  
29  
30  
31  
32  
33  
34  
35  
36  
37  
38  
39  
40  
41  
42  
43  
44  
45  
46  
47  
48  
49  
50  
51  
52  
53  
54  
55  
56  
57  
58  
59  
60

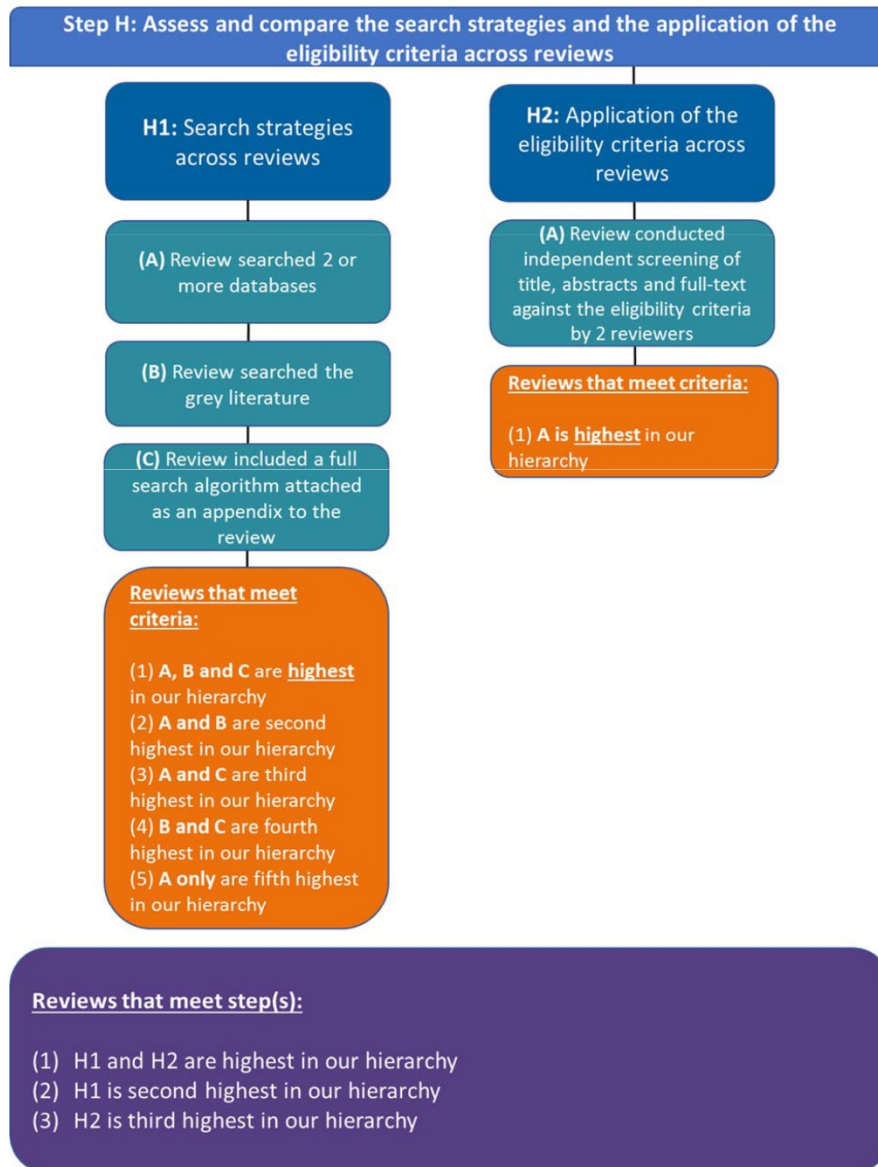

43 **Figure 4. Our Approach to Operationalising Step H of the Jadad Algorithm.**

44  
45 Figure 4

46 163x222mm (300 x 300 DPI)

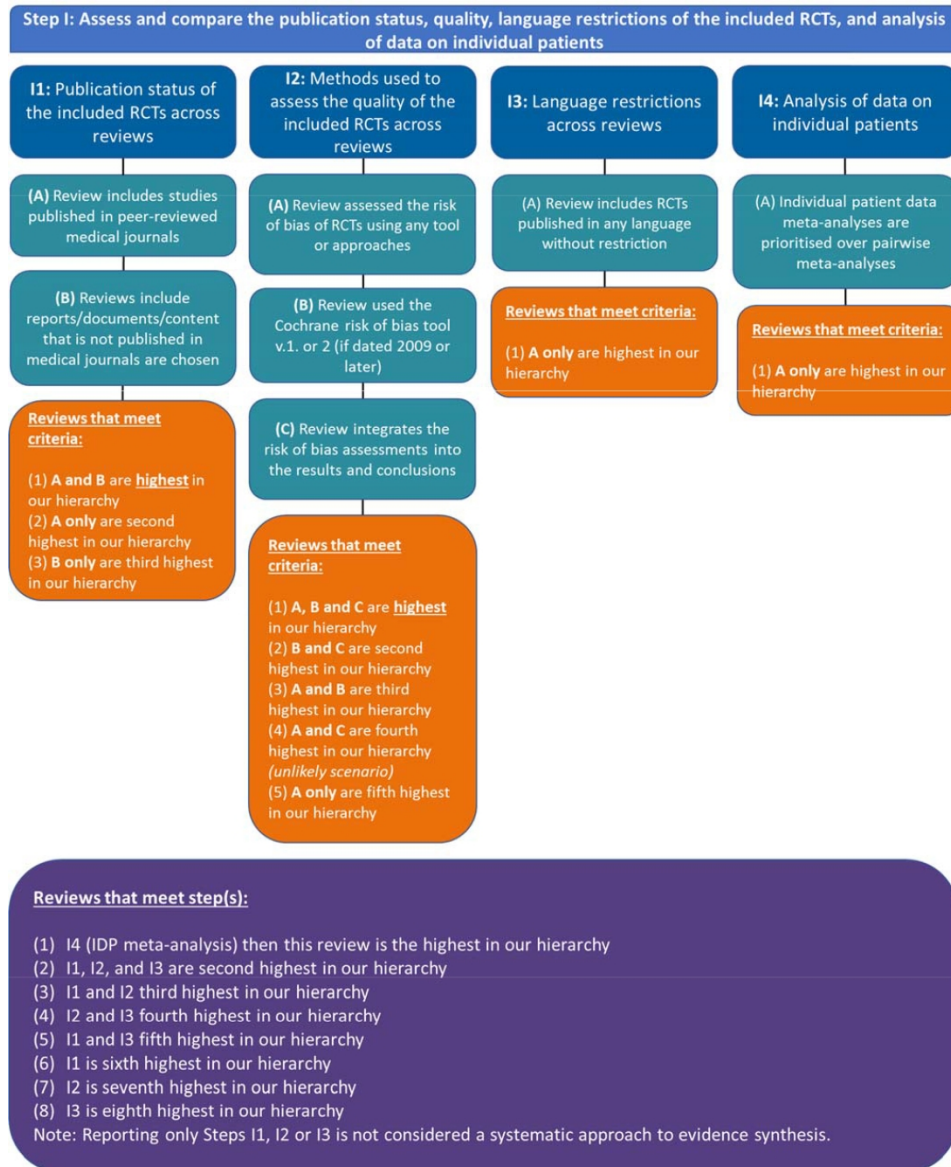

**Figure 5. Our Approach to Operationalising Step I of the Jadad Algorithm.**

Figure 5

175x220mm (300 x 300 DPI)
